# Supplementary material for: Whole-genome sequencing reveals novel ethnicity-specific rare variants associated with Alzheimer’s disease
Source: PubMed Central journal article supplement (PMC9135624; doi:10.1038/s41380-022-01483-0), 2022-03-10
Supplement: 41380_2022_1483_MOESM1_ESM.pdf [file 41380_2022_1483_MOESM1_ESM.pdf]

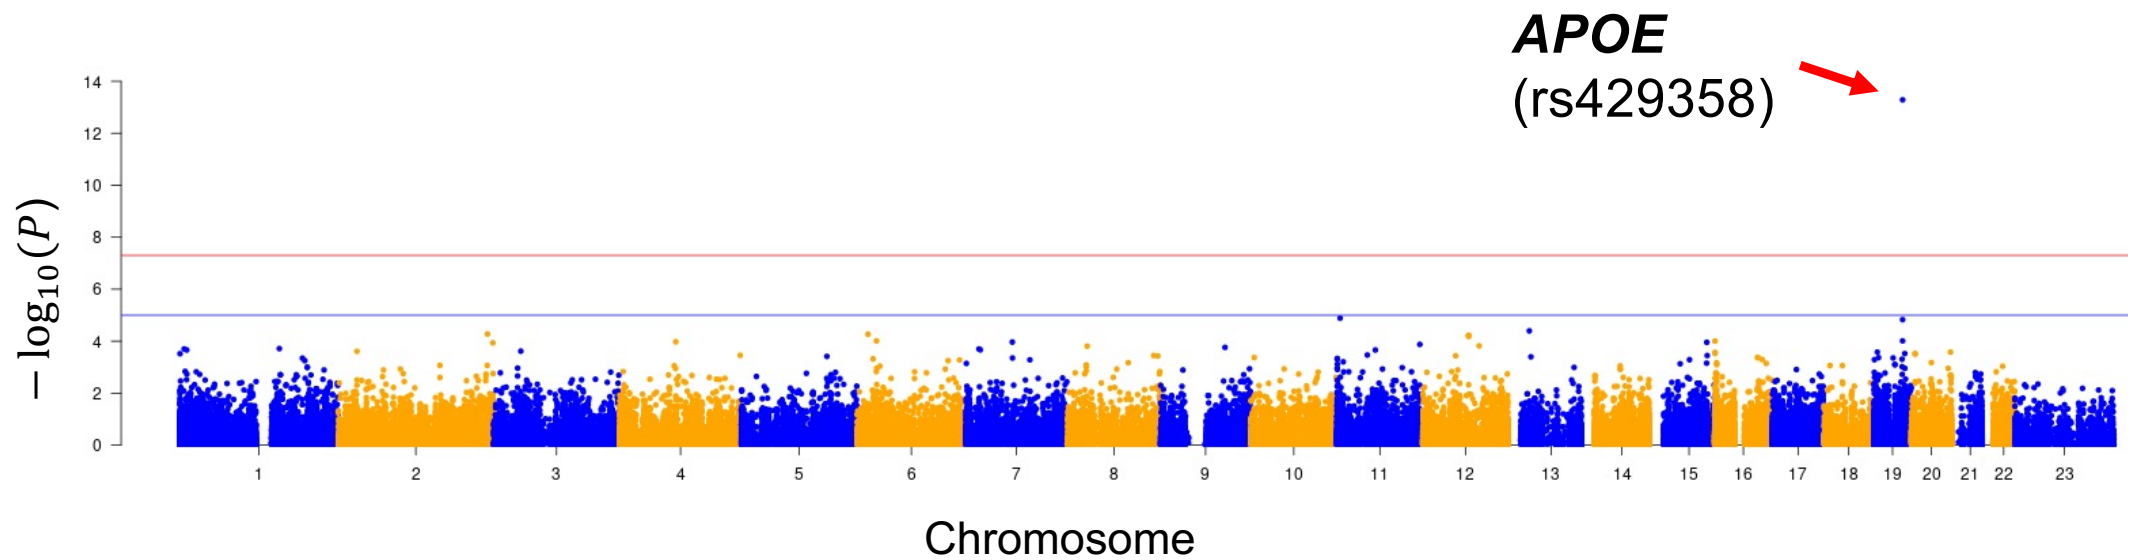

**Figure S1. Genome-wide association study of Alzheimer's disease in the Japanese population.** The association was assessed with logistic regression analysis adjusted for sex and age.
