# Supplementary material for: Whole-genome sequencing reveals novel ethnicity-specific rare variants associated with Alzheimer’s disease
Source: PubMed Central journal article supplement (PMC9135624; doi:10.1038/s41380-022-01483-0), 2022-03-10
Supplement: 41380_2022_1483_MOESM2_ESM.pdf [file 41380_2022_1483_MOESM2_ESM.pdf]

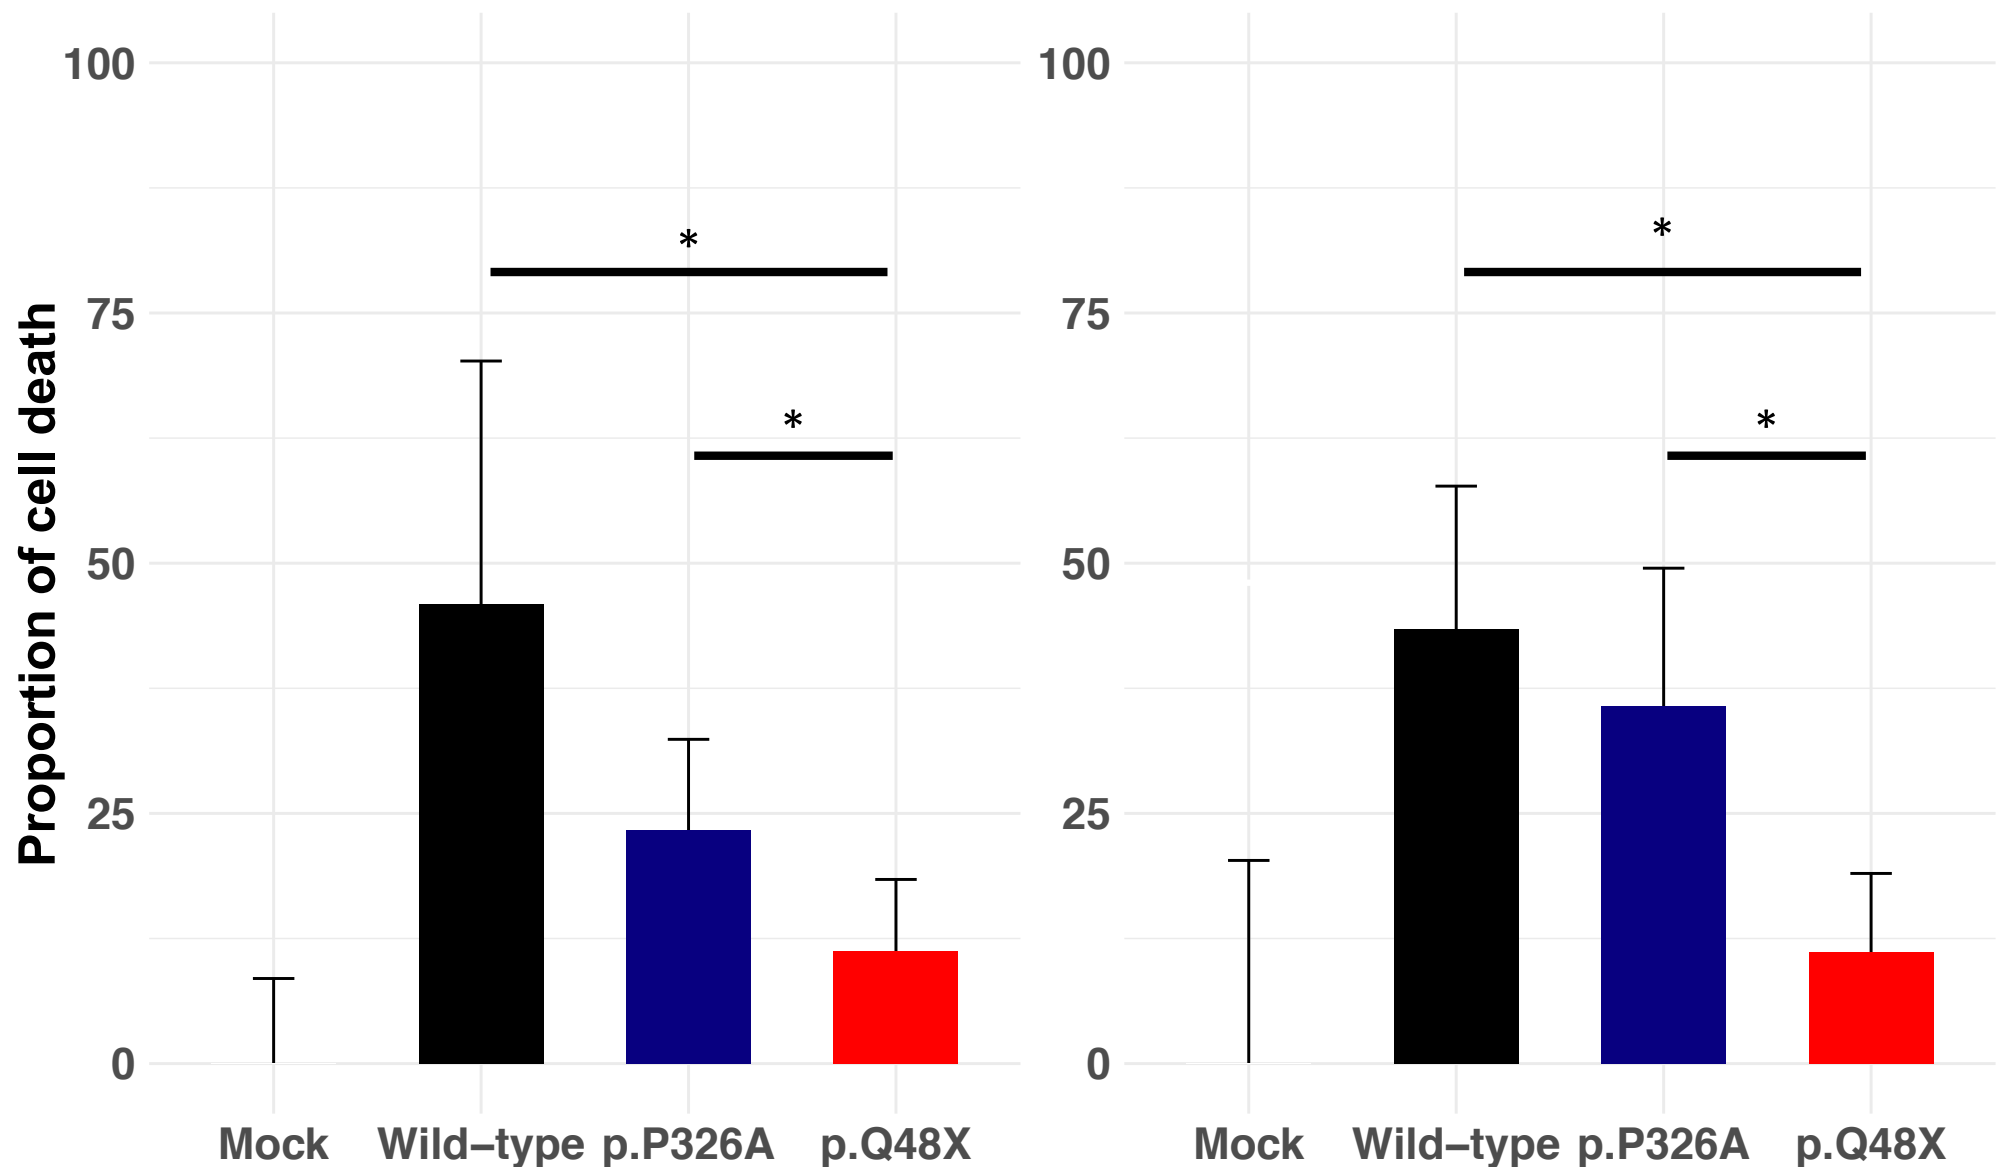

**Figure S2. Functional analysis of *MLKL* variants.**

Proportions of cell death were determined by using SYTOX Green nuclear stain in human HEK293 cells transfected with the *MLKL* variant proteins. \*: Welch's t-test  $P < 0.05$ . Each graph represents a separate replication of the experiment.
