# Supplementary material for: Whole-genome sequencing reveals novel ethnicity-specific rare variants associated with Alzheimer’s disease
Source: PubMed Central journal article supplement (PMC9135624; doi:10.1038/s41380-022-01483-0), 2022-03-10
Supplement: 41380_2022_1483_MOESM3_ESM.pdf [file 41380_2022_1483_MOESM3_ESM.pdf]

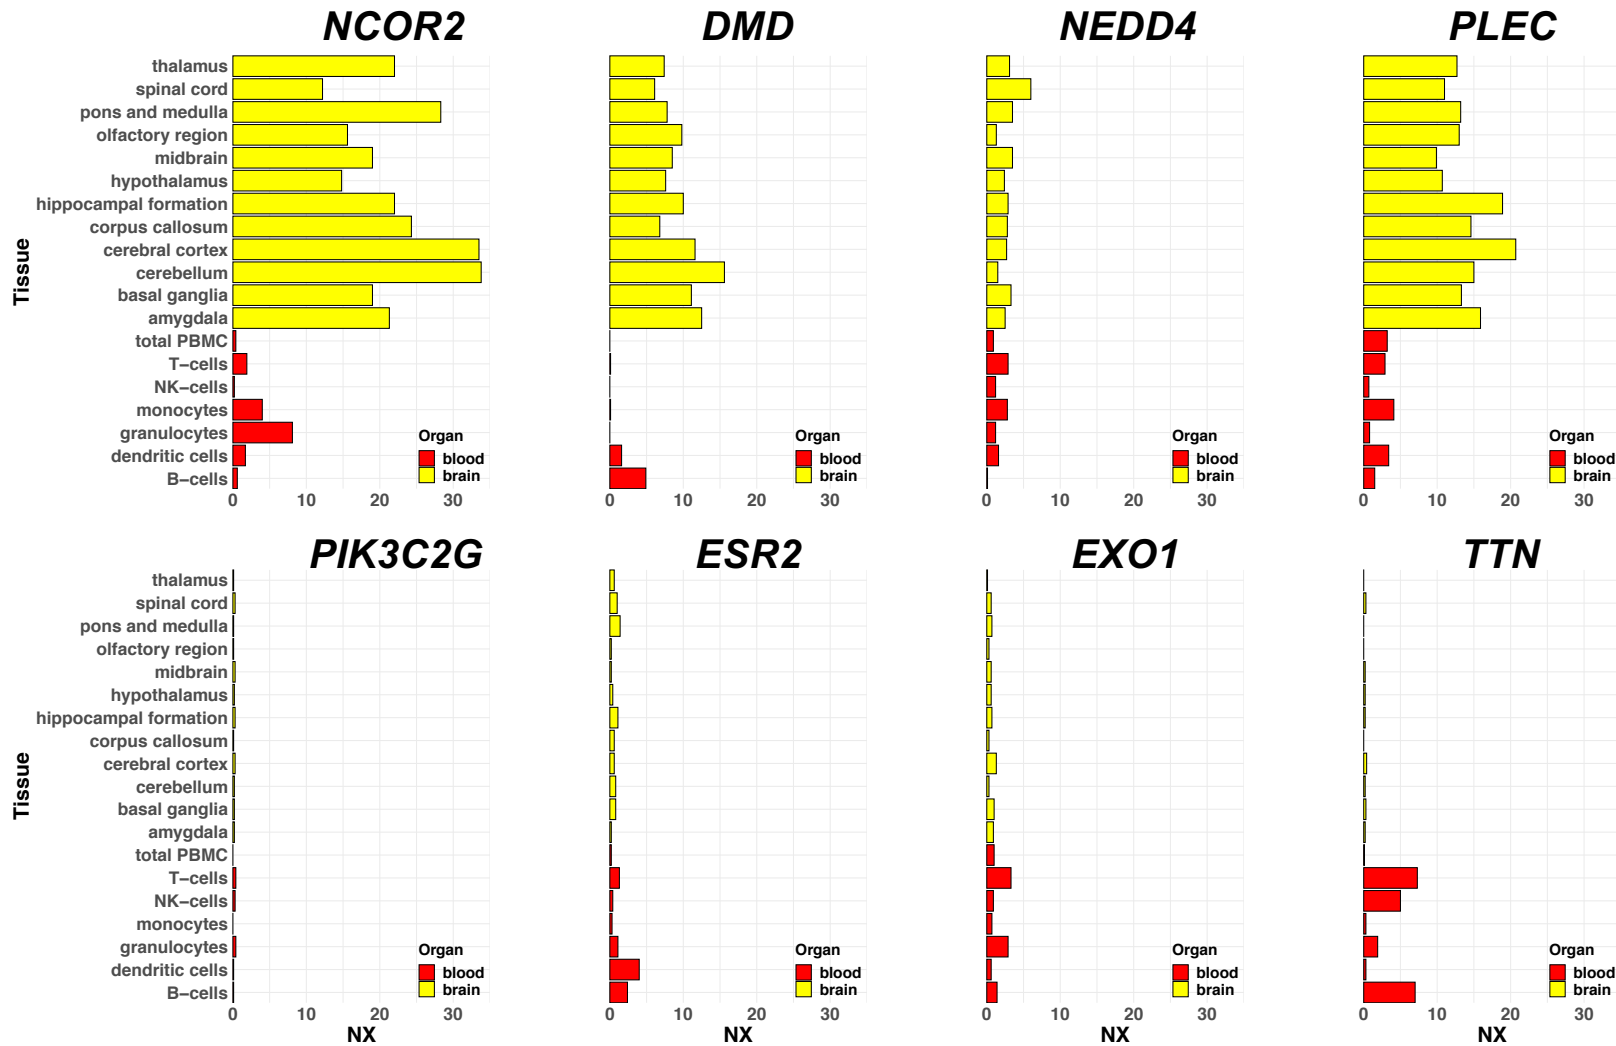

**Figure S3. Expression of hub genes detected in the protein-protein interaction network analysis.** The expression of all hub genes in blood cells and brain tissues was checked by using the Human Protein Atlas (HPA) database. An X-axis represents the resulting transcript expression values, denoted normalized expression (NX). PBMDs, peripheral blood monocytes; NK, natural killer.
