# Supplementary material for: Whole-genome sequencing reveals novel ethnicity-specific rare variants associated with Alzheimer’s disease
Source: PubMed Central journal article supplement (PMC9135624; doi:10.1038/s41380-022-01483-0), 2022-03-10
Supplement: 41380_2022_1483_MOESM4_ESM.pdf [file 41380_2022_1483_MOESM4_ESM.pdf]

**Table S1. Overview of 938 WGS performance**

| Subject ID | Read pairs | Unmapped read pairs | Duplicate PCR read pairs | Mapping rate | PCR duplication rate |
|------------|------------|---------------------|--------------------------|--------------|----------------------|
| AD_1       | 418346521  | 5669219             | 38747288                 | 0.986        | 0.093                |
| AD_2       | 428251062  | 5316662             | 38175641                 | 0.988        | 0.089                |
| AD_3       | 330414277  | 3529755             | 28971504                 | 0.989        | 0.088                |
| AD_4       | 425351935  | 5957347             | 37711020                 | 0.986        | 0.089                |
| AD_5       | 332633236  | 3067351             | 34396268                 | 0.991        | 0.103                |
| AD_6       | 398212016  | 6511282             | 35061493                 | 0.984        | 0.088                |
| AD_7       | 393749063  | 7562755             | 33480020                 | 0.981        | 0.085                |
| AD_8       | 309148030  | 3721811             | 26249217                 | 0.988        | 0.085                |
| AD_9       | 405004141  | 3544328             | 36524566                 | 0.991        | 0.090                |
| AD_10      | 307138762  | 6144657             | 25798122                 | 0.980        | 0.084                |
| AD_11      | 397447090  | 5071712             | 46557100                 | 0.987        | 0.117                |
| AD_12      | 391965968  | 7212967             | 33405625                 | 0.982        | 0.085                |
| AD_13      | 404607733  | 6904584             | 37780208                 | 0.983        | 0.093                |
| AD_14      | 421127504  | 4848169             | 35771368                 | 0.988        | 0.085                |
| AD_15      | 401133544  | 3649410             | 41074405                 | 0.991        | 0.102                |
| AD_16      | 308694324  | 2693212             | 25892907                 | 0.991        | 0.084                |
| AD_17      | 418490719  | 7084699             | 39094557                 | 0.983        | 0.093                |
| AD_18      | 371742135  | 4787974             | 33499231                 | 0.987        | 0.090                |
| AD_19      | 399190478  | 6305616             | 33646488                 | 0.984        | 0.084                |
| AD_20      | 320107858  | 4051562             | 26154687                 | 0.987        | 0.082                |
| AD_21      | 421929473  | 5453935             | 57129966                 | 0.987        | 0.135                |
| AD_22      | 426339202  | 6844638             | 39577507                 | 0.984        | 0.093                |

|       |           |         |          |       |       |
|-------|-----------|---------|----------|-------|-------|
| AD_23 | 310000655 | 6515686 | 27380571 | 0.979 | 0.088 |
| AD_24 | 401573958 | 6583053 | 38607716 | 0.984 | 0.096 |
| AD_25 | 306842197 | 7937094 | 19171273 | 0.974 | 0.062 |
| AD_26 | 398553229 | 5586676 | 33308245 | 0.986 | 0.084 |
| AD_27 | 414686861 | 6724282 | 39546816 | 0.984 | 0.095 |
| AD_28 | 352210860 | 3221434 | 41875953 | 0.991 | 0.119 |
| AD_29 | 414117731 | 6738863 | 33662750 | 0.984 | 0.081 |
| AD_30 | 390559787 | 5190684 | 32383953 | 0.987 | 0.083 |
| AD_31 | 298647477 | 2342210 | 21322155 | 0.992 | 0.071 |
| AD_32 | 425222581 | 6352832 | 40234321 | 0.985 | 0.095 |
| AD_33 | 407110679 | 6407563 | 39328766 | 0.984 | 0.097 |
| AD_34 | 395504715 | 6181391 | 32251526 | 0.984 | 0.082 |
| AD_35 | 338739870 | 5161994 | 29704723 | 0.985 | 0.088 |
| AD_36 | 318013658 | 3328786 | 26220086 | 0.990 | 0.082 |
| AD_37 | 406295569 | 6303702 | 39827237 | 0.984 | 0.098 |
| AD_38 | 398136363 | 6614396 | 35089508 | 0.983 | 0.088 |
| AD_39 | 355998400 | 3028741 | 39150260 | 0.991 | 0.110 |
| AD_40 | 422016877 | 4938490 | 37393923 | 0.988 | 0.089 |
| AD_41 | 320912059 | 3612459 | 26625721 | 0.989 | 0.083 |
| AD_42 | 303737735 | 7340092 | 20720310 | 0.976 | 0.068 |
| AD_43 | 382307574 | 5596787 | 36178033 | 0.985 | 0.095 |
| AD_44 | 422543714 | 4563574 | 82361784 | 0.989 | 0.195 |
| AD_45 | 331179179 | 3165390 | 28062419 | 0.990 | 0.085 |
| AD_46 | 326399267 | 4029258 | 32262641 | 0.988 | 0.099 |

|       |           |         |           |       |       |
|-------|-----------|---------|-----------|-------|-------|
| AD_47 | 346111271 | 2297571 | 37012334  | 0.993 | 0.107 |
| AD_48 | 353044598 | 2594515 | 40087224  | 0.993 | 0.114 |
| AD_49 | 372112132 | 2780629 | 42018543  | 0.993 | 0.113 |
| AD_50 | 370183527 | 2949524 | 41616050  | 0.992 | 0.112 |
| AD_51 | 341661005 | 6500055 | 23994822  | 0.981 | 0.070 |
| AD_52 | 319134733 | 8102297 | 20762016  | 0.975 | 0.065 |
| AD_53 | 398922727 | 5978926 | 37239685  | 0.985 | 0.093 |
| AD_54 | 341200556 | 7332789 | 27174329  | 0.979 | 0.080 |
| AD_55 | 311545495 | 8425023 | 22354834  | 0.973 | 0.072 |
| AD_56 | 371718698 | 8216908 | 26452012  | 0.978 | 0.071 |
| AD_57 | 325981781 | 4185524 | 41431838  | 0.987 | 0.127 |
| AD_58 | 392469514 | 6439915 | 34437769  | 0.984 | 0.088 |
| AD_59 | 406586267 | 5820273 | 36603095  | 0.986 | 0.090 |
| AD_60 | 348245941 | 5058045 | 37370154  | 0.985 | 0.107 |
| AD_61 | 403111620 | 3832390 | 79899300  | 0.990 | 0.198 |
| AD_62 | 576805774 | 7114201 | 101143974 | 0.988 | 0.175 |
| AD_63 | 297155601 | 8682331 | 19238976  | 0.971 | 0.065 |
| AD_64 | 296516323 | 3999382 | 20625726  | 0.987 | 0.070 |
| AD_65 | 414597645 | 6704496 | 36725570  | 0.984 | 0.089 |
| AD_66 | 350796063 | 5107298 | 39600438  | 0.985 | 0.113 |
| AD_67 | 398265943 | 6480287 | 34565738  | 0.984 | 0.087 |
| AD_68 | 454877557 | 4848882 | 80283713  | 0.989 | 0.176 |
| AD_69 | 392794130 | 3844960 | 46671444  | 0.990 | 0.119 |
| AD_70 | 431652089 | 2820102 | 115376228 | 0.993 | 0.267 |

|       |           |         |          |       |       |
|-------|-----------|---------|----------|-------|-------|
| AD_71 | 296886726 | 2186960 | 23184282 | 0.993 | 0.078 |
| AD_72 | 301265563 | 2914406 | 24199110 | 0.990 | 0.080 |
| AD_73 | 392961449 | 5252971 | 51634616 | 0.987 | 0.131 |
| AD_74 | 307808929 | 6301545 | 21176858 | 0.980 | 0.069 |
| AD_75 | 299887991 | 3077900 | 24594574 | 0.990 | 0.082 |
| AD_76 | 393045589 | 6181248 | 33203583 | 0.984 | 0.084 |
| AD_77 | 296475377 | 5758957 | 19526697 | 0.981 | 0.066 |
| AD_78 | 385479767 | 3448455 | 32435398 | 0.991 | 0.084 |
| AD_79 | 320253523 | 7550817 | 22370134 | 0.976 | 0.070 |
| AD_80 | 369430578 | 3153809 | 38654021 | 0.991 | 0.105 |
| AD_81 | 389593003 | 5309987 | 59047184 | 0.986 | 0.152 |
| AD_82 | 346950004 | 2566909 | 40550201 | 0.993 | 0.117 |
| AD_83 | 352598208 | 5594780 | 44095126 | 0.984 | 0.125 |
| AD_84 | 476083189 | 6079818 | 72808735 | 0.987 | 0.153 |
| AD_85 | 297292255 | 7535653 | 18180793 | 0.975 | 0.061 |
| AD_86 | 396037316 | 3856094 | 79023986 | 0.990 | 0.200 |
| AD_87 | 297718235 | 2976427 | 21526668 | 0.990 | 0.072 |
| AD_88 | 423336269 | 9852576 | 34548495 | 0.977 | 0.082 |
| AD_89 | 385252434 | 3305321 | 28765366 | 0.991 | 0.075 |
| AD_90 | 394389564 | 6543461 | 33081070 | 0.983 | 0.084 |
| AD_91 | 391823139 | 4881106 | 53639558 | 0.988 | 0.137 |
| AD_92 | 298255655 | 2875543 | 22272368 | 0.990 | 0.075 |
| AD_93 | 311928451 | 5543038 | 23082934 | 0.982 | 0.074 |
| AD_94 | 298593610 | 2361038 | 23618347 | 0.992 | 0.079 |

|        |           |         |          |       |       |
|--------|-----------|---------|----------|-------|-------|
| AD_95  | 304119619 | 2681464 | 22425103 | 0.991 | 0.074 |
| AD_96  | 297987907 | 4385161 | 20478670 | 0.985 | 0.069 |
| AD_97  | 304057438 | 3128425 | 22626743 | 0.990 | 0.074 |
| AD_98  | 394657905 | 5332762 | 34032137 | 0.986 | 0.086 |
| AD_99  | 298899192 | 3559987 | 21017233 | 0.988 | 0.070 |
| AD_100 | 297144094 | 2332564 | 21844391 | 0.992 | 0.074 |
| AD_101 | 416009600 | 4988459 | 30737948 | 0.988 | 0.074 |
| AD_102 | 298273833 | 2556774 | 22781310 | 0.991 | 0.076 |
| AD_103 | 336077010 | 7211595 | 26187116 | 0.979 | 0.078 |
| AD_104 | 441293451 | 4642828 | 75790504 | 0.989 | 0.172 |
| AD_105 | 381083369 | 4371164 | 28210411 | 0.989 | 0.074 |
| AD_106 | 359543184 | 3670390 | 27091469 | 0.990 | 0.075 |
| AD_107 | 349369517 | 6919713 | 20411397 | 0.980 | 0.058 |
| AD_108 | 355009502 | 4906493 | 51860950 | 0.986 | 0.146 |
| AD_109 | 342706292 | 4075462 | 23196920 | 0.988 | 0.068 |
| AD_110 | 345592260 | 5017358 | 46163861 | 0.985 | 0.134 |
| AD_111 | 434266799 | 4112424 | 65099571 | 0.991 | 0.150 |
| AD_112 | 273004404 | 2767400 | 17832923 | 0.990 | 0.065 |
| AD_113 | 347032041 | 3786753 | 52511846 | 0.989 | 0.151 |
| AD_114 | 468195352 | 7035200 | 63835818 | 0.985 | 0.136 |
| AD_115 | 296286448 | 4397279 | 33738661 | 0.985 | 0.114 |
| AD_116 | 306916384 | 4347942 | 35482551 | 0.986 | 0.116 |
| AD_117 | 393638987 | 7640150 | 34970393 | 0.981 | 0.089 |
| AD_118 | 340242699 | 6246022 | 25084166 | 0.982 | 0.074 |

|        |           |          |          |       |       |
|--------|-----------|----------|----------|-------|-------|
| AD_119 | 420977223 | 6475413  | 35240544 | 0.985 | 0.084 |
| AD_120 | 390779889 | 7907377  | 33620207 | 0.980 | 0.086 |
| AD_121 | 352781142 | 3666118  | 38557529 | 0.990 | 0.109 |
| AD_122 | 307132516 | 8877848  | 18933067 | 0.971 | 0.062 |
| AD_123 | 422894495 | 3899071  | 83510171 | 0.991 | 0.197 |
| AD_124 | 397722092 | 7056051  | 37764333 | 0.982 | 0.095 |
| AD_125 | 328303167 | 10285810 | 23866598 | 0.969 | 0.073 |
| AD_126 | 453743028 | 4631844  | 85529193 | 0.990 | 0.188 |
| AD_127 | 337614468 | 8655553  | 22512294 | 0.974 | 0.067 |
| AD_128 | 356293736 | 3561610  | 39225133 | 0.990 | 0.110 |
| AD_129 | 344657290 | 4883252  | 37261948 | 0.986 | 0.108 |
| AD_130 | 312933175 | 7071409  | 19966972 | 0.977 | 0.064 |
| AD_131 | 357461425 | 7369824  | 37664163 | 0.979 | 0.105 |
| AD_132 | 302505362 | 5095249  | 23678135 | 0.983 | 0.078 |
| AD_133 | 300171687 | 8178914  | 18981847 | 0.973 | 0.063 |
| AD_134 | 295735842 | 6390561  | 16099597 | 0.978 | 0.054 |
| AD_135 | 312265972 | 7947867  | 21905619 | 0.975 | 0.070 |
| AD_136 | 406163016 | 9196628  | 29671959 | 0.977 | 0.073 |
| AD_137 | 401900372 | 5976110  | 34691811 | 0.985 | 0.086 |
| AD_138 | 358729067 | 5311796  | 36371992 | 0.985 | 0.101 |
| AD_139 | 468276679 | 7864542  | 78801608 | 0.983 | 0.168 |
| AD_140 | 331910784 | 4398422  | 23963175 | 0.987 | 0.072 |
| CN_1   | 343733195 | 6167463  | 24784302 | 0.982 | 0.072 |
| CN_2   | 352224080 | 4789438  | 26546978 | 0.986 | 0.075 |

|       |           |         |          |       |       |
|-------|-----------|---------|----------|-------|-------|
| CN_3  | 370004813 | 6337634 | 30999826 | 0.983 | 0.084 |
| CN_4  | 381216709 | 6770772 | 30831375 | 0.982 | 0.081 |
| CN_5  | 326832943 | 4419158 | 23793973 | 0.986 | 0.073 |
| CN_6  | 351216639 | 5801979 | 27748872 | 0.983 | 0.079 |
| CN_7  | 338291256 | 5495947 | 26142250 | 0.984 | 0.077 |
| CN_8  | 348330154 | 6389034 | 26286489 | 0.982 | 0.075 |
| CN_9  | 359030079 | 5405679 | 28888753 | 0.985 | 0.080 |
| CN_10 | 393364431 | 7167526 | 29415491 | 0.982 | 0.075 |
| CN_11 | 398628335 | 7004473 | 40282188 | 0.982 | 0.101 |
| CN_12 | 361294319 | 5610711 | 24790308 | 0.984 | 0.069 |
| CN_13 | 398918418 | 5703467 | 35320305 | 0.986 | 0.089 |
| CN_14 | 379141575 | 7559136 | 28369575 | 0.980 | 0.075 |
| CN_15 | 403756242 | 6128872 | 34372205 | 0.985 | 0.085 |
| CN_16 | 387133804 | 7758613 | 28193729 | 0.980 | 0.073 |
| CN_17 | 404072732 | 6391154 | 26651644 | 0.984 | 0.066 |
| CN_18 | 393668012 | 5706181 | 23600594 | 0.986 | 0.060 |
| CN_19 | 373864878 | 5259409 | 23153874 | 0.986 | 0.062 |
| CN_20 | 353024303 | 6531007 | 19833104 | 0.981 | 0.056 |
| CN_21 | 373912103 | 5367705 | 22680565 | 0.986 | 0.061 |
| CN_22 | 388125859 | 5489637 | 24256892 | 0.986 | 0.062 |
| CN_23 | 361359474 | 7424032 | 20366406 | 0.979 | 0.056 |
| CN_24 | 398785654 | 6935847 | 31451007 | 0.983 | 0.079 |
| CN_25 | 339005420 | 4987695 | 18351375 | 0.985 | 0.054 |
| CN_26 | 342520284 | 6992682 | 20479139 | 0.980 | 0.060 |

|       |           |         |          |       |       |
|-------|-----------|---------|----------|-------|-------|
| CN_27 | 379472635 | 8227136 | 22802871 | 0.978 | 0.060 |
| CN_28 | 390059009 | 7012198 | 25821219 | 0.982 | 0.066 |
| CN_29 | 349543402 | 5983727 | 19808837 | 0.983 | 0.057 |
| CN_30 | 391741240 | 5966038 | 25210768 | 0.985 | 0.064 |
| CN_31 | 371513563 | 7648968 | 19741002 | 0.979 | 0.053 |
| CN_32 | 375766776 | 6948014 | 23932768 | 0.982 | 0.064 |
| CN_33 | 371669741 | 5480942 | 22179043 | 0.985 | 0.060 |
| CN_34 | 346573964 | 5235307 | 20137776 | 0.985 | 0.058 |
| CN_35 | 352392162 | 7035351 | 19560888 | 0.980 | 0.056 |
| CN_36 | 357717766 | 6400294 | 21798338 | 0.982 | 0.061 |
| CN_37 | 371800359 | 6703222 | 19987248 | 0.982 | 0.054 |
| CN_38 | 340549257 | 6982216 | 18905947 | 0.979 | 0.056 |
| CN_39 | 346174660 | 7380388 | 19022752 | 0.979 | 0.055 |
| CN_40 | 388795153 | 6111234 | 25889691 | 0.984 | 0.067 |
| CN_41 | 356647295 | 6666990 | 19940925 | 0.981 | 0.056 |
| CN_42 | 326083835 | 5475781 | 18491721 | 0.983 | 0.057 |
| CN_43 | 351477201 | 7804487 | 20284673 | 0.978 | 0.058 |
| CN_44 | 389154812 | 5226547 | 22951861 | 0.987 | 0.059 |
| CN_45 | 344346139 | 6097995 | 19419814 | 0.982 | 0.056 |
| CN_46 | 357265193 | 5715369 | 19832330 | 0.984 | 0.056 |
| CN_47 | 323633986 | 6282528 | 17480754 | 0.981 | 0.054 |
| CN_48 | 380273950 | 6812684 | 23744987 | 0.982 | 0.062 |
| CN_49 | 335621777 | 5105391 | 18418123 | 0.985 | 0.055 |
| CN_50 | 376801322 | 6924441 | 23143985 | 0.982 | 0.061 |



|       |           |         |          |       |       |
|-------|-----------|---------|----------|-------|-------|
| CN_51 | 347300791 | 5970355 | 19969538 | 0.983 | 0.057 |
| CN_52 | 345247639 | 5681231 | 19249839 | 0.984 | 0.056 |
| CN_53 | 350070920 | 6781626 | 19949881 | 0.981 | 0.057 |
| CN_54 | 370865626 | 8804534 | 19814966 | 0.976 | 0.053 |
| CN_55 | 375400151 | 6534224 | 22758353 | 0.983 | 0.061 |
| CN_56 | 356488893 | 6766062 | 18867895 | 0.981 | 0.053 |
| CN_57 | 337599533 | 5943666 | 19013443 | 0.982 | 0.056 |
| CN_58 | 363033714 | 6984656 | 20914151 | 0.981 | 0.058 |
| CN_59 | 381161463 | 7302400 | 23710704 | 0.981 | 0.062 |
| CN_60 | 369143419 | 6712571 | 22190859 | 0.982 | 0.060 |
| CN_61 | 356133777 | 6973837 | 20347949 | 0.980 | 0.057 |
| CN_62 | 380155742 | 9275764 | 21888740 | 0.976 | 0.058 |
| CN_63 | 347684754 | 5338241 | 19608652 | 0.985 | 0.056 |
| CN_64 | 384740106 | 5967463 | 28749939 | 0.984 | 0.075 |
| CN_65 | 359445762 | 5236590 | 20621613 | 0.985 | 0.057 |
| CN_66 | 372932212 | 7127398 | 21880038 | 0.981 | 0.059 |
| CN_67 | 388130744 | 6722582 | 24476764 | 0.983 | 0.063 |
| CN_68 | 378067433 | 5206246 | 23323420 | 0.986 | 0.062 |
| CN_69 | 377446837 | 6601366 | 21642823 | 0.983 | 0.057 |
| CN_70 | 345820553 | 6502260 | 18590909 | 0.981 | 0.054 |
| CN_71 | 384542605 | 6971744 | 26224667 | 0.982 | 0.068 |
| CN_72 | 356705599 | 5833898 | 20173045 | 0.984 | 0.057 |
| CN_73 | 327882880 | 6179909 | 21920672 | 0.981 | 0.067 |
| CN_74 | 344270482 | 5478994 | 23898076 | 0.984 | 0.069 |

|       |           |         |          |       |       |
|-------|-----------|---------|----------|-------|-------|
| CN_75 | 373314207 | 6876939 | 27063595 | 0.982 | 0.072 |
| CN_76 | 332629114 | 5875906 | 21758829 | 0.982 | 0.065 |
| CN_77 | 325133890 | 5353228 | 21716111 | 0.984 | 0.067 |
| CN_78 | 374115778 | 6984823 | 26177213 | 0.981 | 0.070 |
| CN_79 | 325396659 | 4945296 | 21783773 | 0.985 | 0.067 |
| CN_80 | 328390251 | 5244616 | 19723230 | 0.984 | 0.060 |
| CN_81 | 371316742 | 5340856 | 28233373 | 0.986 | 0.076 |
| CN_82 | 324344237 | 5247786 | 20465354 | 0.984 | 0.063 |
| CN_83 | 331613954 | 4913877 | 20966315 | 0.985 | 0.063 |
| CN_84 | 357207818 | 5870481 | 26821989 | 0.984 | 0.075 |
| CN_85 | 339644662 | 6581343 | 22294775 | 0.981 | 0.066 |
| CN_86 | 320193378 | 6013021 | 20003218 | 0.981 | 0.062 |
| CN_87 | 338510233 | 6384001 | 21456714 | 0.981 | 0.063 |
| CN_88 | 351252826 | 5500568 | 22498273 | 0.984 | 0.064 |
| CN_89 | 343995674 | 6101595 | 22998715 | 0.982 | 0.067 |
| CN_90 | 351725960 | 6825770 | 23246809 | 0.981 | 0.066 |
| CN_91 | 347530707 | 6375412 | 22440983 | 0.982 | 0.065 |
| CN_92 | 345314399 | 6477691 | 22883727 | 0.981 | 0.066 |
| CN_93 | 367435572 | 5729656 | 25551302 | 0.984 | 0.070 |
| CN_94 | 380088377 | 6463953 | 26351783 | 0.983 | 0.069 |
| CN_95 | 346707944 | 5328021 | 22252827 | 0.985 | 0.064 |
| CN_96 | 364820327 | 6564452 | 24610933 | 0.982 | 0.067 |
| CN_97 | 343560752 | 5603724 | 22806731 | 0.984 | 0.066 |
| CN_98 | 377330069 | 7778966 | 26515323 | 0.979 | 0.070 |

|        |           |         |          |       |       |
|--------|-----------|---------|----------|-------|-------|
| CN_99  | 384781819 | 7894532 | 24377805 | 0.979 | 0.063 |
| CN_100 | 396098269 | 6175652 | 34642564 | 0.984 | 0.087 |
| CN_101 | 361258342 | 6093466 | 21626183 | 0.983 | 0.060 |
| CN_102 | 391689498 | 5523318 | 29841312 | 0.986 | 0.076 |
| CN_103 | 385967520 | 6970556 | 25581276 | 0.982 | 0.066 |
| CN_104 | 399460977 | 6707753 | 30295112 | 0.983 | 0.076 |
| CN_105 | 378877279 | 7502901 | 24851940 | 0.980 | 0.066 |
| CN_106 | 389192442 | 7200208 | 29614763 | 0.981 | 0.076 |
| CN_107 | 391718224 | 7081094 | 27451684 | 0.982 | 0.070 |
| CN_108 | 369387034 | 7289062 | 25896505 | 0.980 | 0.070 |
| CN_109 | 350261773 | 6524357 | 22940329 | 0.981 | 0.065 |
| CN_110 | 350068589 | 7056685 | 22390793 | 0.980 | 0.064 |
| CN_111 | 366847416 | 5154102 | 25840102 | 0.986 | 0.070 |
| CN_112 | 386142619 | 6658610 | 27558874 | 0.983 | 0.071 |
| CN_113 | 340025268 | 6942711 | 21710988 | 0.980 | 0.064 |
| CN_114 | 376426937 | 5315080 | 31135497 | 0.986 | 0.083 |
| CN_115 | 352511203 | 6245135 | 23064265 | 0.982 | 0.065 |
| CN_116 | 360676937 | 5508188 | 24435073 | 0.985 | 0.068 |
| CN_117 | 405489697 | 7700682 | 25629448 | 0.981 | 0.063 |
| CN_118 | 372906980 | 7217401 | 24571852 | 0.981 | 0.066 |
| CN_119 | 387252278 | 6525625 | 23728209 | 0.983 | 0.061 |
| CN_120 | 384158229 | 8047480 | 21414821 | 0.979 | 0.056 |
| CN_121 | 336981298 | 5860906 | 17517426 | 0.983 | 0.052 |
| CN_122 | 386537800 | 7585248 | 25458550 | 0.980 | 0.066 |

|        |           |         |          |       |       |
|--------|-----------|---------|----------|-------|-------|
| CN_123 | 344567876 | 6766372 | 19101388 | 0.980 | 0.055 |
| CN_124 | 373671210 | 6637182 | 21555730 | 0.982 | 0.058 |
| CN_125 | 349109765 | 7138889 | 19842842 | 0.980 | 0.057 |
| CN_126 | 387576734 | 6040651 | 24301651 | 0.984 | 0.063 |
| CN_127 | 339401361 | 5304318 | 19150553 | 0.984 | 0.056 |
| CN_128 | 333909183 | 6644587 | 17160230 | 0.980 | 0.051 |
| CN_129 | 389777227 | 8442438 | 25582641 | 0.978 | 0.066 |
| CN_130 | 356704651 | 6983501 | 19616106 | 0.980 | 0.055 |
| CN_131 | 340672371 | 6044493 | 17198042 | 0.982 | 0.050 |
| CN_132 | 386323909 | 8763928 | 24482904 | 0.977 | 0.063 |
| CN_133 | 356351306 | 6078459 | 19975494 | 0.983 | 0.056 |
| CN_134 | 321448074 | 5061450 | 17527454 | 0.984 | 0.055 |
| CN_135 | 342514281 | 5505059 | 18504591 | 0.984 | 0.054 |
| CN_136 | 359847949 | 6887766 | 20650002 | 0.981 | 0.057 |
| CN_137 | 354163492 | 7003706 | 20222500 | 0.980 | 0.057 |
| CN_138 | 362730131 | 9346831 | 20707543 | 0.974 | 0.057 |
| CN_139 | 351153523 | 6670624 | 19939489 | 0.981 | 0.057 |
| CN_140 | 372373666 | 5898273 | 21323794 | 0.984 | 0.057 |
| CN_141 | 391014489 | 6781233 | 23188301 | 0.983 | 0.059 |
| CN_142 | 338808135 | 5249364 | 18376580 | 0.985 | 0.054 |
| CN_143 | 349820814 | 6873464 | 20894551 | 0.980 | 0.060 |
| CN_144 | 357055762 | 5123798 | 20883831 | 0.986 | 0.058 |
| CN_145 | 374788956 | 6913158 | 23619832 | 0.982 | 0.063 |
| CN_146 | 383882261 | 7769010 | 21891789 | 0.980 | 0.057 |

|        |           |         |          |       |       |
|--------|-----------|---------|----------|-------|-------|
| CN_147 | 391105466 | 7509729 | 30385563 | 0.981 | 0.078 |
| CN_148 | 343767084 | 6574966 | 18846823 | 0.981 | 0.055 |
| CN_149 | 394496451 | 7150955 | 25928402 | 0.982 | 0.066 |
| CN_150 | 383350586 | 6414254 | 23487405 | 0.983 | 0.061 |
| CN_151 | 385806868 | 8355924 | 23782136 | 0.978 | 0.062 |
| CN_152 | 387983498 | 7307859 | 25845597 | 0.981 | 0.067 |
| CN_153 | 388278067 | 6799623 | 25410719 | 0.982 | 0.065 |
| CN_154 | 389106466 | 6842361 | 22508418 | 0.982 | 0.058 |
| CN_155 | 371082777 | 7250574 | 23358357 | 0.980 | 0.063 |
| CN_156 | 370488114 | 5781832 | 22670392 | 0.984 | 0.061 |
| CN_157 | 380763078 | 6361407 | 23478504 | 0.983 | 0.062 |
| CN_158 | 346959908 | 8533008 | 19793958 | 0.975 | 0.057 |
| CN_159 | 391191262 | 7869401 | 31517615 | 0.980 | 0.081 |
| CN_160 | 335455001 | 7057233 | 17857909 | 0.979 | 0.053 |
| CN_161 | 346877625 | 7243946 | 20020914 | 0.979 | 0.058 |
| CN_162 | 366205885 | 6270911 | 22071965 | 0.983 | 0.060 |
| CN_163 | 348692240 | 5385685 | 19569757 | 0.985 | 0.056 |
| CN_164 | 383758889 | 6828816 | 24275326 | 0.982 | 0.063 |
| CN_165 | 360270268 | 7043598 | 19003787 | 0.980 | 0.053 |
| CN_166 | 378223659 | 6755720 | 23717149 | 0.982 | 0.063 |
| CN_167 | 358168018 | 4582302 | 20747331 | 0.987 | 0.058 |
| CN_168 | 370993547 | 6902801 | 38647511 | 0.981 | 0.104 |
| CN_169 | 369908578 | 7653316 | 35034729 | 0.979 | 0.095 |
| CN_170 | 393850172 | 9107380 | 41367476 | 0.977 | 0.105 |

|        |           |         |          |       |       |
|--------|-----------|---------|----------|-------|-------|
| CN_171 | 375184051 | 9352685 | 35648788 | 0.975 | 0.095 |
| CN_172 | 397412363 | 9188059 | 37397222 | 0.977 | 0.094 |
| CN_173 | 371765315 | 7181416 | 37620040 | 0.981 | 0.101 |
| CN_174 | 393722206 | 7735331 | 43572076 | 0.980 | 0.111 |
| CN_175 | 369872343 | 5923479 | 35661646 | 0.984 | 0.096 |
| CN_176 | 354887006 | 5681041 | 35458589 | 0.984 | 0.100 |
| CN_177 | 356562062 | 8500386 | 30795102 | 0.976 | 0.086 |
| CN_178 | 382099355 | 6638373 | 43277255 | 0.983 | 0.113 |
| CN_179 | 379540976 | 6719353 | 35312430 | 0.982 | 0.093 |
| CN_180 | 378598619 | 7741808 | 38334913 | 0.980 | 0.101 |
| CN_181 | 382500889 | 6405995 | 37904638 | 0.983 | 0.099 |
| CN_182 | 364253160 | 6710328 | 39575085 | 0.982 | 0.109 |
| CN_183 | 376651917 | 7197215 | 35466670 | 0.981 | 0.094 |
| CN_184 | 376891082 | 6870638 | 35697162 | 0.982 | 0.095 |
| CN_185 | 367738851 | 6110916 | 35341220 | 0.983 | 0.096 |
| CN_186 | 380268259 | 6351517 | 39721398 | 0.983 | 0.104 |
| CN_187 | 375299208 | 6581224 | 37248084 | 0.982 | 0.099 |
| CN_188 | 386447335 | 7947055 | 36626188 | 0.979 | 0.095 |
| CN_189 | 380045988 | 7733640 | 37162174 | 0.980 | 0.098 |
| CN_190 | 379944552 | 7662714 | 35273011 | 0.980 | 0.093 |
| CN_191 | 387699686 | 7147891 | 41507631 | 0.982 | 0.107 |
| CN_192 | 374814256 | 9107075 | 35788581 | 0.976 | 0.095 |
| CN_193 | 376254457 | 9254958 | 36219613 | 0.975 | 0.096 |
| CN_194 | 378025900 | 7640342 | 37038275 | 0.980 | 0.098 |

|        |           |         |          |       |       |
|--------|-----------|---------|----------|-------|-------|
| CN_195 | 377592385 | 7285254 | 36628296 | 0.981 | 0.097 |
| CN_196 | 385158154 | 8048775 | 35857387 | 0.979 | 0.093 |
| CN_197 | 384128149 | 8413897 | 39529233 | 0.978 | 0.103 |
| CN_198 | 377374616 | 6830554 | 37019737 | 0.982 | 0.098 |
| CN_199 | 369145641 | 6912705 | 44028717 | 0.981 | 0.119 |
| CN_200 | 349886255 | 7510513 | 32321059 | 0.979 | 0.092 |
| CN_201 | 362095387 | 6865597 | 35715065 | 0.981 | 0.099 |
| CN_202 | 366752423 | 6005910 | 37469475 | 0.984 | 0.102 |
| CN_203 | 361200763 | 7948692 | 32991224 | 0.978 | 0.091 |
| CN_204 | 343167665 | 5618623 | 31948753 | 0.984 | 0.093 |
| CN_205 | 354790354 | 6157656 | 32332072 | 0.983 | 0.091 |
| CN_206 | 357439310 | 6118282 | 34030516 | 0.983 | 0.095 |
| CN_207 | 354102235 | 8272535 | 33781155 | 0.977 | 0.095 |
| CN_208 | 355994658 | 5583581 | 35771693 | 0.984 | 0.100 |
| CN_209 | 367418364 | 7373950 | 35617539 | 0.980 | 0.097 |
| CN_210 | 360084844 | 6125343 | 34663118 | 0.983 | 0.096 |
| CN_211 | 383077978 | 7470428 | 38134881 | 0.980 | 0.100 |
| CN_212 | 389718146 | 9839271 | 36845299 | 0.975 | 0.095 |
| CN_213 | 379929841 | 6796924 | 38145270 | 0.982 | 0.100 |
| CN_214 | 360444243 | 8072151 | 36014025 | 0.978 | 0.100 |
| CN_215 | 356690311 | 9560544 | 34616101 | 0.973 | 0.097 |
| CN_216 | 339212219 | 5602690 | 32523994 | 0.983 | 0.096 |
| CN_217 | 330024589 | 3702358 | 34087591 | 0.989 | 0.103 |
| CN_218 | 332776059 | 5559885 | 32696655 | 0.983 | 0.098 |

|        |           |         |          |       |       |
|--------|-----------|---------|----------|-------|-------|
| CN_219 | 340073094 | 5711104 | 31447085 | 0.983 | 0.092 |
| CN_220 | 335837221 | 5943943 | 31805026 | 0.982 | 0.095 |
| CN_221 | 330399590 | 4608367 | 29729254 | 0.986 | 0.090 |
| CN_222 | 359869259 | 5036730 | 37521343 | 0.986 | 0.104 |
| CN_223 | 334491921 | 6481855 | 29437604 | 0.981 | 0.088 |
| CN_224 | 330479630 | 5305390 | 30942742 | 0.984 | 0.094 |
| CN_225 | 331679820 | 5137568 | 31624276 | 0.985 | 0.095 |
| CN_226 | 352814987 | 7564301 | 31908940 | 0.979 | 0.090 |
| CN_227 | 361063304 | 5035631 | 37055579 | 0.986 | 0.103 |
| CN_228 | 334105639 | 5154348 | 31737096 | 0.985 | 0.095 |
| CN_229 | 337028141 | 5598767 | 30195920 | 0.983 | 0.090 |
| CN_230 | 350718235 | 7752519 | 35032575 | 0.978 | 0.100 |
| CN_231 | 335831866 | 5317395 | 31970756 | 0.984 | 0.095 |
| CN_232 | 388746822 | 5715917 | 45430772 | 0.985 | 0.117 |
| CN_233 | 328835645 | 5910593 | 30665682 | 0.982 | 0.093 |
| CN_234 | 343166588 | 5081413 | 33570768 | 0.985 | 0.098 |
| CN_235 | 385201971 | 5429341 | 37332259 | 0.986 | 0.097 |
| CN_236 | 363663174 | 5846569 | 38768442 | 0.984 | 0.107 |
| CN_237 | 333001001 | 4786413 | 33703319 | 0.986 | 0.101 |
| CN_238 | 336905690 | 4522451 | 31216668 | 0.987 | 0.093 |
| CN_239 | 383455464 | 4879931 | 43690543 | 0.987 | 0.114 |
| CN_240 | 329718345 | 5810689 | 30362216 | 0.982 | 0.092 |
| CN_241 | 330177302 | 4645002 | 30838308 | 0.986 | 0.093 |
| CN_242 | 339097416 | 5434595 | 33304604 | 0.984 | 0.098 |



|        |           |         |          |       |       |
|--------|-----------|---------|----------|-------|-------|
| CN_243 | 335972951 | 4554642 | 33251317 | 0.986 | 0.099 |
| CN_244 | 344778881 | 6741508 | 32685707 | 0.980 | 0.095 |
| CN_245 | 338305895 | 5099263 | 32905593 | 0.985 | 0.097 |
| CN_246 | 337490040 | 4227084 | 33895251 | 0.987 | 0.100 |
| CN_247 | 341361907 | 4477008 | 32491859 | 0.987 | 0.095 |
| CN_248 | 342246193 | 6669916 | 29968667 | 0.981 | 0.088 |
| CN_249 | 357133472 | 7769647 | 37839018 | 0.978 | 0.106 |
| CN_250 | 366862448 | 8219781 | 32243107 | 0.978 | 0.088 |
| CN_251 | 382164793 | 6915446 | 40357375 | 0.982 | 0.106 |
| CN_252 | 335915095 | 5151779 | 20944051 | 0.985 | 0.062 |
| CN_253 | 331340227 | 4734599 | 20825563 | 0.986 | 0.063 |
| CN_254 | 346816437 | 6796872 | 21331338 | 0.980 | 0.062 |
| CN_255 | 353293552 | 6638472 | 28899017 | 0.981 | 0.082 |
| CN_256 | 363262819 | 8265524 | 33881032 | 0.977 | 0.093 |
| CN_257 | 377456855 | 6850327 | 34642149 | 0.982 | 0.092 |
| CN_258 | 362915632 | 6643341 | 34253096 | 0.982 | 0.094 |
| CN_259 | 374003952 | 7007333 | 35183213 | 0.981 | 0.094 |
| CN_260 | 360181111 | 7089494 | 33710270 | 0.980 | 0.094 |
| CN_261 | 368425597 | 9239077 | 33523198 | 0.975 | 0.091 |
| CN_262 | 371924477 | 7759528 | 35447507 | 0.979 | 0.095 |
| CN_263 | 385813198 | 6564656 | 38669393 | 0.983 | 0.100 |
| CN_264 | 386240379 | 7795293 | 37557493 | 0.980 | 0.097 |
| CN_265 | 370116646 | 7683179 | 34912467 | 0.979 | 0.094 |
| CN_266 | 362790853 | 7977331 | 32731228 | 0.978 | 0.090 |

|        |           |         |          |       |       |
|--------|-----------|---------|----------|-------|-------|
| CN_267 | 369593741 | 8294627 | 36305751 | 0.978 | 0.098 |
| CN_268 | 361846279 | 5639641 | 44014268 | 0.984 | 0.122 |
| CN_269 | 371315218 | 6609359 | 32412255 | 0.982 | 0.087 |
| CN_270 | 360835779 | 5851022 | 38096787 | 0.984 | 0.106 |
| CN_271 | 361682833 | 5881589 | 32785308 | 0.984 | 0.091 |
| CN_272 | 366632826 | 6135908 | 37486203 | 0.983 | 0.102 |
| CN_273 | 358549188 | 7151549 | 31671255 | 0.980 | 0.088 |
| CN_274 | 368033788 | 7545578 | 38456475 | 0.979 | 0.104 |
| CN_275 | 359048834 | 8992648 | 32335827 | 0.975 | 0.090 |
| CN_276 | 345600765 | 6436354 | 21035892 | 0.981 | 0.061 |
| CN_277 | 330919310 | 7106641 | 19018811 | 0.979 | 0.057 |
| CN_278 | 364663820 | 6048784 | 22292219 | 0.983 | 0.061 |
| CN_279 | 354606905 | 6330587 | 23117561 | 0.982 | 0.065 |
| CN_280 | 322565103 | 5464711 | 20582660 | 0.983 | 0.064 |
| CN_281 | 335076780 | 6108547 | 20472485 | 0.982 | 0.061 |
| CN_282 | 354723379 | 5529438 | 22352428 | 0.984 | 0.063 |
| CN_283 | 334883014 | 7293892 | 21236080 | 0.978 | 0.063 |
| CN_284 | 335523044 | 5154816 | 21517580 | 0.985 | 0.064 |
| CN_285 | 332603247 | 6183254 | 20937242 | 0.981 | 0.063 |
| CN_286 | 358332075 | 5086338 | 23275131 | 0.986 | 0.065 |
| CN_287 | 336019536 | 4813053 | 21448872 | 0.986 | 0.064 |
| CN_288 | 351677794 | 5550832 | 20426472 | 0.984 | 0.058 |
| CN_289 | 328129559 | 4705724 | 20981260 | 0.986 | 0.064 |
| CN_290 | 337147111 | 4484494 | 20930226 | 0.987 | 0.062 |

|        |           |         |          |       |       |
|--------|-----------|---------|----------|-------|-------|
| CN_291 | 348311128 | 5391453 | 21828849 | 0.985 | 0.063 |
| CN_292 | 336851201 | 6121109 | 22082029 | 0.982 | 0.066 |
| CN_293 | 333526013 | 4607308 | 19872850 | 0.986 | 0.060 |
| CN_294 | 372551266 | 6344620 | 24144400 | 0.983 | 0.065 |
| CN_295 | 331826931 | 5474399 | 19498710 | 0.984 | 0.059 |
| CN_296 | 350010223 | 6272306 | 24113608 | 0.982 | 0.069 |
| CN_297 | 352256349 | 5383123 | 22492488 | 0.985 | 0.064 |
| CN_298 | 333459888 | 6160706 | 20439664 | 0.982 | 0.061 |
| CN_299 | 333709798 | 3546739 | 20225635 | 0.989 | 0.061 |
| CN_300 | 350515921 | 5286310 | 22016244 | 0.985 | 0.063 |
| CN_301 | 349085699 | 6302331 | 22947159 | 0.982 | 0.066 |
| CN_302 | 332577305 | 4996070 | 19801014 | 0.985 | 0.060 |
| CN_303 | 370348849 | 5909730 | 22811571 | 0.984 | 0.062 |
| CN_304 | 322525714 | 4125818 | 21745300 | 0.987 | 0.067 |
| CN_305 | 357751609 | 5301444 | 22090810 | 0.985 | 0.062 |
| CN_306 | 323100225 | 4926844 | 20552127 | 0.985 | 0.064 |
| CN_307 | 345507399 | 6584961 | 21553367 | 0.981 | 0.062 |
| CN_308 | 363708830 | 5660141 | 23188418 | 0.984 | 0.064 |
| CN_309 | 355065748 | 5854487 | 22546622 | 0.984 | 0.063 |
| CN_310 | 348603648 | 6429301 | 22046868 | 0.982 | 0.063 |
| CN_311 | 337529797 | 5513885 | 22505369 | 0.984 | 0.067 |
| CN_312 | 353339692 | 6389378 | 21611012 | 0.982 | 0.061 |
| CN_313 | 331134451 | 6126113 | 20199048 | 0.981 | 0.061 |
| CN_314 | 352063215 | 4877490 | 22837976 | 0.986 | 0.065 |

|        |           |         |          |       |       |
|--------|-----------|---------|----------|-------|-------|
| CN_315 | 349137082 | 5098519 | 26112905 | 0.985 | 0.075 |
| CN_316 | 334540617 | 4535856 | 20578483 | 0.986 | 0.062 |
| CN_317 | 319633273 | 5567795 | 19125608 | 0.983 | 0.060 |
| CN_318 | 352728944 | 5317285 | 22463414 | 0.985 | 0.064 |
| CN_319 | 332648014 | 4227828 | 21743564 | 0.987 | 0.065 |
| CN_320 | 336136965 | 4707319 | 21579864 | 0.986 | 0.064 |
| CN_321 | 323833037 | 5473544 | 19091357 | 0.983 | 0.059 |
| CN_322 | 353553542 | 6094191 | 21717954 | 0.983 | 0.061 |
| CN_323 | 327225932 | 3958678 | 22772241 | 0.988 | 0.070 |
| CN_324 | 363072163 | 7665894 | 22488983 | 0.979 | 0.062 |
| CN_325 | 378382093 | 7033881 | 24793109 | 0.981 | 0.066 |
| CN_326 | 318539720 | 4264205 | 18833547 | 0.987 | 0.059 |
| CN_327 | 376059812 | 8365726 | 23893288 | 0.978 | 0.064 |
| CN_328 | 348589197 | 6387606 | 19291577 | 0.982 | 0.055 |
| CN_329 | 363868229 | 5541657 | 24295716 | 0.985 | 0.067 |
| CN_330 | 355570761 | 4249817 | 21983329 | 0.988 | 0.062 |
| CN_331 | 330456136 | 6576194 | 20002312 | 0.980 | 0.061 |
| CN_332 | 356806152 | 5995526 | 22641593 | 0.983 | 0.063 |
| CN_333 | 350074505 | 5955415 | 20208020 | 0.983 | 0.058 |
| CN_334 | 342437318 | 6348526 | 19532362 | 0.981 | 0.057 |
| CN_335 | 353137761 | 6606172 | 19772672 | 0.981 | 0.056 |
| CN_336 | 401390374 | 7803943 | 27481778 | 0.981 | 0.068 |
| CN_337 | 357736165 | 4895432 | 20828282 | 0.986 | 0.058 |
| CN_338 | 327313421 | 6655861 | 19153876 | 0.980 | 0.059 |

|        |           |         |          |       |       |
|--------|-----------|---------|----------|-------|-------|
| CN_339 | 359653454 | 7098879 | 21491671 | 0.980 | 0.060 |
| CN_340 | 384849398 | 4862415 | 23394149 | 0.987 | 0.061 |
| CN_341 | 347264628 | 5947448 | 20667862 | 0.983 | 0.060 |
| CN_342 | 360158727 | 7792268 | 23629476 | 0.978 | 0.066 |
| CN_343 | 372107123 | 6851147 | 21019387 | 0.982 | 0.056 |
| CN_344 | 324708809 | 5321773 | 19057403 | 0.984 | 0.059 |
| CN_345 | 392113646 | 6009509 | 24979629 | 0.985 | 0.064 |
| CN_346 | 326726060 | 5769785 | 19097964 | 0.982 | 0.058 |
| CN_347 | 381977201 | 8429368 | 25129225 | 0.978 | 0.066 |
| CN_348 | 343972522 | 5855633 | 20969413 | 0.983 | 0.061 |
| CN_349 | 343614165 | 5866269 | 19885709 | 0.983 | 0.058 |
| CN_350 | 350862936 | 6707209 | 20796770 | 0.981 | 0.059 |
| CN_351 | 369373508 | 6994340 | 20966634 | 0.981 | 0.057 |
| CN_352 | 380782593 | 7199864 | 24925735 | 0.981 | 0.065 |
| CN_353 | 341923581 | 7127135 | 19092236 | 0.979 | 0.056 |
| CN_354 | 345375333 | 6816473 | 20845038 | 0.980 | 0.060 |
| CN_355 | 371464732 | 6793906 | 22449391 | 0.982 | 0.060 |
| CN_356 | 389455705 | 6912138 | 25274703 | 0.982 | 0.065 |
| CN_357 | 365200043 | 5646001 | 22675090 | 0.985 | 0.062 |
| CN_358 | 342516299 | 5659537 | 19856006 | 0.983 | 0.058 |
| CN_359 | 381893608 | 8640071 | 23447822 | 0.977 | 0.061 |
| CN_360 | 348484008 | 6404003 | 20490898 | 0.982 | 0.059 |
| CN_361 | 389426268 | 6228124 | 28435737 | 0.984 | 0.073 |
| CN_362 | 360468465 | 6042547 | 21020080 | 0.983 | 0.058 |

|        |           |         |          |       |       |
|--------|-----------|---------|----------|-------|-------|
| CN_363 | 376494194 | 7023928 | 22992300 | 0.981 | 0.061 |
| CN_364 | 385014465 | 6246187 | 24328490 | 0.984 | 0.063 |
| CN_365 | 379013462 | 8066414 | 25465904 | 0.979 | 0.067 |
| CN_366 | 386691950 | 6894424 | 29788073 | 0.982 | 0.077 |
| CN_367 | 388253941 | 8685628 | 27051311 | 0.978 | 0.070 |
| CN_368 | 346977698 | 6626362 | 22446534 | 0.981 | 0.065 |
| CN_369 | 370930901 | 7072350 | 25134060 | 0.981 | 0.068 |
| CN_370 | 391878618 | 7318375 | 27768884 | 0.981 | 0.071 |
| CN_371 | 362225994 | 5862195 | 26214729 | 0.984 | 0.072 |
| CN_372 | 405823651 | 6935188 | 31821710 | 0.983 | 0.078 |
| CN_373 | 341645436 | 5207599 | 23640246 | 0.985 | 0.069 |
| CN_374 | 353067110 | 6525649 | 22428045 | 0.982 | 0.064 |
| CN_375 | 377631991 | 7192674 | 30762275 | 0.981 | 0.081 |
| CN_376 | 328984562 | 5395204 | 22104722 | 0.984 | 0.067 |
| CN_377 | 361091411 | 6371772 | 25269465 | 0.982 | 0.070 |
| CN_378 | 362071483 | 6401633 | 24962842 | 0.982 | 0.069 |
| CN_379 | 322293040 | 4944870 | 20133696 | 0.985 | 0.062 |
| CN_380 | 362641497 | 7130366 | 28213256 | 0.980 | 0.078 |
| CN_381 | 334609344 | 6184478 | 22826492 | 0.982 | 0.068 |
| CN_382 | 329987490 | 6716639 | 21474510 | 0.980 | 0.065 |
| CN_383 | 345823758 | 5823546 | 22863243 | 0.983 | 0.066 |
| CN_384 | 323453064 | 5581054 | 22456884 | 0.983 | 0.069 |
| CN_385 | 324010714 | 5454880 | 22613230 | 0.983 | 0.070 |
| CN_386 | 354423643 | 8004722 | 24602174 | 0.977 | 0.069 |

|        |           |         |          |       |       |
|--------|-----------|---------|----------|-------|-------|
| CN_387 | 334915342 | 5786077 | 22458528 | 0.983 | 0.067 |
| CN_388 | 355333933 | 6804135 | 25019160 | 0.981 | 0.070 |
| CN_389 | 371753150 | 7147371 | 27657202 | 0.981 | 0.074 |
| CN_390 | 378371230 | 6025136 | 28162253 | 0.984 | 0.074 |
| CN_391 | 335718151 | 5182966 | 22652613 | 0.985 | 0.067 |
| CN_392 | 329442261 | 6908373 | 24234649 | 0.979 | 0.074 |
| CN_393 | 379544127 | 6437382 | 26499538 | 0.983 | 0.070 |
| CN_394 | 392448508 | 6315714 | 38670180 | 0.984 | 0.099 |
| CN_395 | 362640330 | 7652373 | 22860491 | 0.979 | 0.063 |
| CN_396 | 394567748 | 5477720 | 33159023 | 0.986 | 0.084 |
| CN_397 | 474090035 | 7880980 | 43891142 | 0.983 | 0.093 |
| CN_398 | 385769204 | 8000710 | 31271656 | 0.979 | 0.081 |
| CN_399 | 376710426 | 7446484 | 25857920 | 0.980 | 0.069 |
| CN_400 | 394589787 | 7544687 | 31811003 | 0.981 | 0.081 |
| CN_401 | 390079528 | 6351786 | 28839518 | 0.984 | 0.074 |
| CN_402 | 359595204 | 7371002 | 26595875 | 0.980 | 0.074 |
| CN_403 | 350940084 | 7341962 | 23971933 | 0.979 | 0.068 |
| CN_404 | 349390196 | 9300884 | 24034833 | 0.973 | 0.069 |
| CN_405 | 364519232 | 6140064 | 25669818 | 0.983 | 0.070 |
| CN_406 | 374006149 | 6667560 | 28565956 | 0.982 | 0.076 |
| CN_407 | 335849420 | 7362445 | 23310819 | 0.978 | 0.069 |
| CN_408 | 398253870 | 7759072 | 39541664 | 0.981 | 0.099 |
| CN_409 | 336138357 | 6685731 | 22132586 | 0.980 | 0.066 |
| CN_410 | 334998638 | 6671756 | 23297382 | 0.980 | 0.070 |

|        |           |          |          |       |       |
|--------|-----------|----------|----------|-------|-------|
| CN_411 | 357093957 | 7514592  | 26814083 | 0.979 | 0.075 |
| CN_412 | 374701516 | 5938191  | 29335941 | 0.984 | 0.078 |
| CN_413 | 326526860 | 4843810  | 22499040 | 0.985 | 0.069 |
| CN_414 | 339436963 | 6176335  | 23784915 | 0.982 | 0.070 |
| CN_415 | 448253027 | 8398958  | 35656512 | 0.981 | 0.080 |
| CN_416 | 466918809 | 9585170  | 39654691 | 0.979 | 0.085 |
| CN_417 | 415656228 | 9536592  | 35194929 | 0.977 | 0.085 |
| CN_418 | 447679878 | 8267785  | 36946775 | 0.982 | 0.083 |
| CN_419 | 459219250 | 8791449  | 44682573 | 0.981 | 0.097 |
| CN_420 | 456749757 | 8986865  | 39424211 | 0.980 | 0.086 |
| CN_421 | 452713484 | 9419229  | 37341535 | 0.979 | 0.082 |
| CN_422 | 448285178 | 8126071  | 39536918 | 0.982 | 0.088 |
| CN_423 | 451532258 | 9680130  | 38978893 | 0.979 | 0.086 |
| CN_424 | 426194732 | 9408558  | 38221138 | 0.978 | 0.090 |
| CN_425 | 433836407 | 8949530  | 33620078 | 0.979 | 0.077 |
| CN_426 | 478420077 | 10842975 | 42623071 | 0.977 | 0.089 |
| CN_427 | 459620713 | 6075972  | 44095738 | 0.987 | 0.096 |
| CN_428 | 356724395 | 6417978  | 29495227 | 0.982 | 0.083 |
| CN_429 | 351177182 | 5604384  | 27223453 | 0.984 | 0.078 |
| CN_430 | 334562411 | 6295825  | 26640604 | 0.981 | 0.080 |
| CN_431 | 333201336 | 5466298  | 23993342 | 0.984 | 0.072 |
| CN_432 | 330074424 | 6499248  | 31608239 | 0.980 | 0.096 |
| CN_433 | 353203416 | 5989890  | 26229012 | 0.983 | 0.074 |
| CN_434 | 337670511 | 4709321  | 29478020 | 0.986 | 0.087 |



|        |           |          |          |       |       |
|--------|-----------|----------|----------|-------|-------|
| CN_435 | 331686167 | 5567505  | 24047490 | 0.983 | 0.073 |
| CN_436 | 328503860 | 5952013  | 27202559 | 0.982 | 0.083 |
| CN_437 | 332217692 | 7706468  | 23433978 | 0.977 | 0.071 |
| CN_438 | 343087234 | 6365706  | 28904285 | 0.981 | 0.084 |
| CN_439 | 349585656 | 5743986  | 27478977 | 0.984 | 0.079 |
| CN_440 | 387156859 | 7251673  | 33324052 | 0.981 | 0.086 |
| CN_441 | 393681908 | 9212103  | 32163090 | 0.977 | 0.082 |
| CN_442 | 404610210 | 10147795 | 32651906 | 0.975 | 0.081 |
| CN_443 | 400583421 | 7829425  | 34234029 | 0.980 | 0.085 |
| CN_444 | 367407317 | 7576765  | 31012997 | 0.979 | 0.084 |
| CN_445 | 406231141 | 7973782  | 34244857 | 0.980 | 0.084 |
| CN_446 | 344729553 | 5632118  | 33161206 | 0.984 | 0.096 |
| CN_447 | 429810742 | 6475537  | 36845933 | 0.985 | 0.086 |
| CN_448 | 417631764 | 8319301  | 37987297 | 0.980 | 0.091 |
| CN_449 | 384228623 | 7683189  | 31406599 | 0.980 | 0.082 |
| CN_450 | 522946638 | 11883669 | 44682706 | 0.977 | 0.085 |
| CN_451 | 501272111 | 10120206 | 39431587 | 0.980 | 0.079 |
| CN_452 | 517478049 | 9199450  | 44345498 | 0.982 | 0.086 |
| CN_453 | 495099165 | 8439352  | 35993375 | 0.983 | 0.073 |
| CN_454 | 522342437 | 8485780  | 45483619 | 0.984 | 0.087 |
| CN_455 | 515552457 | 7448908  | 40111450 | 0.986 | 0.078 |
| CN_456 | 525643027 | 10956819 | 42788247 | 0.979 | 0.081 |
| CN_457 | 466328787 | 9196190  | 32721582 | 0.980 | 0.070 |
| CN_458 | 483340596 | 9101197  | 38914411 | 0.981 | 0.081 |

|        |           |          |          |       |       |
|--------|-----------|----------|----------|-------|-------|
| CN_459 | 474339533 | 8909431  | 32218561 | 0.981 | 0.068 |
| CN_460 | 468774377 | 7863149  | 33042085 | 0.983 | 0.070 |
| CN_461 | 473105855 | 8645363  | 33279228 | 0.982 | 0.070 |
| CN_462 | 456366860 | 7902128  | 38008187 | 0.983 | 0.083 |
| CN_463 | 483724440 | 8216259  | 34410940 | 0.983 | 0.071 |
| CN_464 | 469062229 | 10328979 | 33213242 | 0.978 | 0.071 |
| CN_465 | 465044941 | 8506168  | 34664111 | 0.982 | 0.075 |
| CN_466 | 490174105 | 6442112  | 36509231 | 0.987 | 0.074 |
| CN_467 | 335399723 | 6580565  | 22935844 | 0.980 | 0.068 |
| CN_468 | 380442800 | 6915874  | 30271996 | 0.982 | 0.080 |
| CN_469 | 344788925 | 6900643  | 22563142 | 0.980 | 0.065 |
| CN_470 | 320726172 | 5215240  | 20167999 | 0.984 | 0.063 |
| CN_471 | 379403085 | 5299330  | 31042202 | 0.986 | 0.082 |
| CN_472 | 333092160 | 6474397  | 22151400 | 0.981 | 0.067 |
| CN_473 | 380890668 | 7493412  | 27819573 | 0.980 | 0.073 |
| CN_474 | 334038972 | 5886479  | 23780190 | 0.982 | 0.071 |
| CN_475 | 356233410 | 6136256  | 23396161 | 0.983 | 0.066 |
| CN_476 | 347204978 | 7708161  | 24440221 | 0.978 | 0.070 |
| CN_477 | 364759849 | 8386602  | 24496760 | 0.977 | 0.067 |
| CN_478 | 385297114 | 8422045  | 29701246 | 0.978 | 0.077 |
| CN_479 | 350130277 | 6127276  | 22737506 | 0.983 | 0.065 |
| CN_480 | 345521484 | 6178206  | 23277988 | 0.982 | 0.067 |
| CN_481 | 374218466 | 6798837  | 25780577 | 0.982 | 0.069 |
| CN_482 | 382359168 | 5358319  | 29417355 | 0.986 | 0.077 |

|        |           |          |          |       |       |
|--------|-----------|----------|----------|-------|-------|
| CN_483 | 361727566 | 5838232  | 25184793 | 0.984 | 0.070 |
| CN_484 | 372635546 | 6263336  | 24888414 | 0.983 | 0.067 |
| CN_485 | 389001442 | 10831233 | 28757852 | 0.972 | 0.074 |
| CN_486 | 356391643 | 5724853  | 24120565 | 0.984 | 0.068 |
| CN_487 | 376717964 | 7400922  | 34961862 | 0.980 | 0.093 |
| CN_488 | 370589833 | 5527232  | 24639218 | 0.985 | 0.066 |
| CN_489 | 374396739 | 5882578  | 26713616 | 0.984 | 0.071 |
| CN_490 | 406488242 | 5433015  | 30516822 | 0.987 | 0.075 |
| CN_491 | 378900859 | 5526679  | 29221669 | 0.985 | 0.077 |
| CN_492 | 376395783 | 6406969  | 28223443 | 0.983 | 0.075 |
| CN_493 | 386506416 | 7149870  | 26583679 | 0.982 | 0.069 |
| CN_494 | 351098516 | 5626912  | 21674203 | 0.984 | 0.062 |
| CN_495 | 391627669 | 7382107  | 33755736 | 0.981 | 0.086 |
| CN_496 | 360619994 | 6821017  | 23769106 | 0.981 | 0.066 |
| CN_497 | 365594469 | 5657449  | 24972125 | 0.985 | 0.068 |
| CN_498 | 341036293 | 6495197  | 23240414 | 0.981 | 0.068 |
| CN_499 | 357645223 | 5566969  | 25056449 | 0.984 | 0.070 |
| CN_500 | 382701752 | 6049003  | 28407402 | 0.984 | 0.074 |
| CN_501 | 345463627 | 7833893  | 23070599 | 0.977 | 0.067 |
| CN_502 | 341567293 | 5122772  | 22453190 | 0.985 | 0.066 |
| CN_503 | 378574982 | 5849290  | 29156712 | 0.985 | 0.077 |
| CN_504 | 359377317 | 6380665  | 23919696 | 0.982 | 0.067 |
| CN_505 | 344292144 | 7473045  | 21666421 | 0.978 | 0.063 |
| CN_506 | 366231688 | 6216277  | 29375925 | 0.983 | 0.080 |

|        |           |         |          |       |       |
|--------|-----------|---------|----------|-------|-------|
| CN_507 | 331867322 | 5903000 | 21030537 | 0.982 | 0.063 |
| CN_508 | 318406336 | 5588325 | 18653267 | 0.982 | 0.059 |
| CN_509 | 353607836 | 6200235 | 26459963 | 0.982 | 0.075 |
| CN_510 | 352421719 | 5995811 | 19832198 | 0.983 | 0.056 |
| CN_511 | 342348881 | 6775275 | 18790317 | 0.980 | 0.055 |
| CN_512 | 352749341 | 5618472 | 19241772 | 0.984 | 0.055 |
| CN_513 | 356416764 | 5008478 | 20858522 | 0.986 | 0.059 |
| CN_514 | 357021970 | 6277762 | 20018813 | 0.982 | 0.056 |
| CN_515 | 364954078 | 6527234 | 20565494 | 0.982 | 0.056 |
| CN_516 | 339937022 | 5449743 | 18537625 | 0.984 | 0.055 |
| CN_517 | 353183493 | 4611157 | 20454666 | 0.987 | 0.058 |
| CN_518 | 373217672 | 5869121 | 24364981 | 0.984 | 0.065 |
| CN_519 | 387608904 | 4866792 | 24040529 | 0.987 | 0.062 |
| CN_520 | 357539131 | 5271713 | 19524542 | 0.985 | 0.055 |
| CN_521 | 377993610 | 5321760 | 23395203 | 0.986 | 0.062 |
| CN_522 | 358257209 | 6037932 | 21130232 | 0.983 | 0.059 |
| CN_523 | 356165599 | 6187457 | 20144797 | 0.983 | 0.057 |
| CN_524 | 373689531 | 7395322 | 22228226 | 0.980 | 0.059 |
| CN_525 | 381485826 | 6270957 | 22032030 | 0.984 | 0.058 |
| CN_526 | 355834909 | 5224212 | 28373108 | 0.985 | 0.080 |
| CN_527 | 369376976 | 6561057 | 19664099 | 0.982 | 0.053 |
| CN_528 | 398242370 | 4711769 | 26552272 | 0.988 | 0.067 |
| CN_529 | 387462728 | 7343880 | 23576705 | 0.981 | 0.061 |
| CN_530 | 355337356 | 5682391 | 24035581 | 0.984 | 0.068 |

|        |           |          |          |       |       |
|--------|-----------|----------|----------|-------|-------|
| CN_531 | 350928934 | 6432204  | 20662628 | 0.982 | 0.059 |
| CN_532 | 345348802 | 5195199  | 23267013 | 0.985 | 0.067 |
| CN_533 | 348851487 | 4770469  | 21282137 | 0.986 | 0.061 |
| CN_534 | 376877745 | 5466352  | 22823233 | 0.985 | 0.061 |
| CN_535 | 362581873 | 6618085  | 20068819 | 0.982 | 0.055 |
| CN_536 | 367648285 | 7821010  | 19508883 | 0.979 | 0.053 |
| CN_537 | 382048006 | 6774116  | 22990108 | 0.982 | 0.060 |
| CN_538 | 349996646 | 6263924  | 19749484 | 0.982 | 0.056 |
| CN_539 | 361952957 | 5990842  | 31144897 | 0.983 | 0.086 |
| CN_540 | 343309938 | 4693191  | 17751604 | 0.986 | 0.052 |
| CN_541 | 367604258 | 8101750  | 21038326 | 0.978 | 0.057 |
| CN_542 | 367594915 | 7459378  | 22064948 | 0.980 | 0.060 |
| CN_543 | 384102948 | 6249405  | 25276111 | 0.984 | 0.066 |
| CN_544 | 356761644 | 6297489  | 27987296 | 0.982 | 0.078 |
| CN_545 | 361637681 | 7270559  | 30783104 | 0.980 | 0.085 |
| CN_546 | 431958226 | 6587711  | 40113930 | 0.985 | 0.093 |
| CN_547 | 348373978 | 6265293  | 29752153 | 0.982 | 0.085 |
| CN_548 | 439251851 | 11523293 | 38031668 | 0.974 | 0.087 |
| CN_549 | 348603477 | 5380327  | 22679976 | 0.985 | 0.065 |
| CN_550 | 387910844 | 6880208  | 25836041 | 0.982 | 0.067 |
| CN_551 | 340710569 | 5306146  | 21111934 | 0.984 | 0.062 |
| CN_552 | 344764426 | 6006600  | 20051893 | 0.983 | 0.058 |
| CN_553 | 340614428 | 6880131  | 21194198 | 0.980 | 0.062 |
| CN_554 | 346006287 | 6396292  | 20264871 | 0.982 | 0.059 |

|        |           |         |          |       |       |
|--------|-----------|---------|----------|-------|-------|
| CN_555 | 376655596 | 7295112 | 26939965 | 0.981 | 0.072 |
| CN_556 | 370299287 | 5779370 | 22794826 | 0.984 | 0.062 |
| CN_557 | 345821800 | 5599099 | 20833477 | 0.984 | 0.060 |
| CN_558 | 355993097 | 6913429 | 21502866 | 0.981 | 0.060 |
| CN_559 | 361240215 | 6658566 | 22393809 | 0.982 | 0.062 |
| CN_560 | 348384549 | 6473652 | 21540029 | 0.981 | 0.062 |
| CN_561 | 375987959 | 7479722 | 23567738 | 0.980 | 0.063 |
| CN_562 | 358616185 | 6309207 | 21414199 | 0.982 | 0.060 |
| CN_563 | 392078040 | 6755173 | 26215867 | 0.983 | 0.067 |
| CN_564 | 389995664 | 6673154 | 26186166 | 0.983 | 0.067 |
| CN_565 | 367463741 | 5932679 | 22772373 | 0.984 | 0.062 |
| CN_566 | 352714269 | 6778687 | 22795373 | 0.981 | 0.065 |
| CN_567 | 380184210 | 6440327 | 23754310 | 0.983 | 0.062 |
| CN_568 | 388677298 | 6546151 | 26802231 | 0.983 | 0.069 |
| CN_569 | 392108186 | 5844961 | 25158288 | 0.985 | 0.064 |
| CN_570 | 369479132 | 6899609 | 22671045 | 0.981 | 0.061 |
| CN_571 | 399881838 | 5335791 | 29287145 | 0.987 | 0.073 |
| CN_572 | 380225227 | 6002889 | 24825832 | 0.984 | 0.065 |
| CN_573 | 398429056 | 7163303 | 25062168 | 0.982 | 0.063 |
| CN_574 | 366063079 | 5364846 | 26894478 | 0.985 | 0.073 |
| CN_575 | 397111920 | 6610147 | 26448804 | 0.983 | 0.067 |
| CN_576 | 384209630 | 6019764 | 27479378 | 0.984 | 0.072 |
| CN_577 | 373538562 | 7718930 | 23499103 | 0.979 | 0.063 |
| CN_578 | 376412798 | 9013073 | 21781163 | 0.976 | 0.058 |

|        |           |         |          |       |       |
|--------|-----------|---------|----------|-------|-------|
| CN_579 | 368106683 | 5472720 | 24555570 | 0.985 | 0.067 |
| CN_580 | 396832713 | 6400324 | 27215958 | 0.984 | 0.069 |
| CN_581 | 364577402 | 7030009 | 22845631 | 0.981 | 0.063 |
| CN_582 | 367820559 | 5678072 | 33522768 | 0.985 | 0.091 |
| CN_583 | 364337029 | 7927207 | 23262036 | 0.978 | 0.064 |
| CN_584 | 383241381 | 7131632 | 26104391 | 0.981 | 0.068 |
| CN_585 | 361888398 | 6141000 | 24676867 | 0.983 | 0.068 |
| CN_586 | 347150494 | 6019656 | 21317533 | 0.983 | 0.061 |
| CN_587 | 393395150 | 5968470 | 28146566 | 0.985 | 0.072 |
| CN_588 | 374063820 | 6346031 | 21154281 | 0.983 | 0.057 |
| CN_589 | 390053808 | 7422348 | 27151259 | 0.981 | 0.070 |
| CN_590 | 371639209 | 4932923 | 23261019 | 0.987 | 0.063 |
| CN_591 | 366014881 | 6846220 | 24057604 | 0.981 | 0.066 |
| CN_592 | 373331680 | 7530542 | 23343876 | 0.980 | 0.063 |
| CN_593 | 383012721 | 5830141 | 26054428 | 0.985 | 0.068 |
| CN_594 | 379529026 | 7451995 | 22711392 | 0.980 | 0.060 |
| CN_595 | 374048605 | 6267355 | 23857589 | 0.983 | 0.064 |
| CN_596 | 343631444 | 4916765 | 21050497 | 0.986 | 0.061 |
| CN_597 | 369737284 | 7014724 | 27206206 | 0.981 | 0.074 |
| CN_598 | 371562321 | 7637053 | 22713788 | 0.979 | 0.061 |
| CN_599 | 352027256 | 7381808 | 21602774 | 0.979 | 0.061 |
| CN_600 | 373635772 | 7851822 | 24271488 | 0.979 | 0.065 |
| CN_601 | 395970291 | 4308735 | 26586149 | 0.989 | 0.067 |
| CN_602 | 340448167 | 5267163 | 21203032 | 0.985 | 0.062 |

|        |           |          |          |       |       |
|--------|-----------|----------|----------|-------|-------|
| CN_603 | 374019497 | 6155231  | 27023931 | 0.984 | 0.072 |
| CN_604 | 346621931 | 7649099  | 21536422 | 0.978 | 0.062 |
| CN_605 | 332126148 | 4914162  | 21170542 | 0.985 | 0.064 |
| CN_606 | 366481460 | 5452823  | 26230870 | 0.985 | 0.072 |
| CN_607 | 327716800 | 5534258  | 20680290 | 0.983 | 0.063 |
| CN_608 | 366789400 | 7300894  | 25142915 | 0.980 | 0.069 |
| CN_609 | 340285211 | 5648866  | 22059353 | 0.983 | 0.065 |
| CN_610 | 334292292 | 4727846  | 21518135 | 0.986 | 0.064 |
| CN_611 | 330596726 | 6416756  | 21106954 | 0.981 | 0.064 |
| CN_612 | 359611239 | 7857063  | 22537814 | 0.978 | 0.063 |
| CN_613 | 371159320 | 7436309  | 26171170 | 0.980 | 0.071 |
| CN_614 | 339235875 | 6198687  | 20707899 | 0.982 | 0.061 |
| CN_615 | 332261648 | 6408960  | 21517654 | 0.981 | 0.065 |
| CN_616 | 348525702 | 6528159  | 22463240 | 0.981 | 0.064 |
| CN_617 | 366872319 | 6032468  | 25399158 | 0.984 | 0.069 |
| CN_618 | 344945844 | 5359663  | 23261476 | 0.984 | 0.067 |
| CN_619 | 339208182 | 5474239  | 21227525 | 0.984 | 0.063 |
| CN_620 | 382324530 | 10628305 | 25185730 | 0.972 | 0.066 |
| CN_621 | 342285585 | 5378467  | 22183431 | 0.984 | 0.065 |
| CN_622 | 380875074 | 6926660  | 30109125 | 0.982 | 0.079 |
| CN_623 | 357669468 | 7524628  | 23110930 | 0.979 | 0.065 |
| CN_624 | 366289901 | 8010190  | 23501182 | 0.978 | 0.064 |
| CN_625 | 369830018 | 6141800  | 24953385 | 0.983 | 0.067 |
| CN_626 | 360004036 | 6999629  | 25847772 | 0.981 | 0.072 |



|        |           |         |          |       |       |
|--------|-----------|---------|----------|-------|-------|
| CN_627 | 358226385 | 5854581 | 25975083 | 0.984 | 0.073 |
| CN_628 | 370062944 | 8102452 | 22223610 | 0.978 | 0.060 |
| CN_629 | 334317254 | 5294797 | 20452963 | 0.984 | 0.061 |
| CN_630 | 374455943 | 7062016 | 27930478 | 0.981 | 0.075 |
| CN_631 | 345222025 | 6106800 | 21791629 | 0.982 | 0.063 |
| CN_632 | 359413937 | 7081684 | 23174860 | 0.980 | 0.064 |
| CN_633 | 349091365 | 7146534 | 22644541 | 0.980 | 0.065 |
| CN_634 | 356992302 | 6675675 | 24150264 | 0.981 | 0.068 |
| CN_635 | 376414726 | 5554838 | 26723149 | 0.985 | 0.071 |
| CN_636 | 347770112 | 6538817 | 22477522 | 0.981 | 0.065 |
| CN_637 | 359899992 | 5500478 | 24479423 | 0.985 | 0.068 |
| CN_638 | 379833821 | 5860247 | 26956571 | 0.985 | 0.071 |
| CN_639 | 330994642 | 4565429 | 22325803 | 0.986 | 0.067 |
| CN_640 | 360862975 | 5686796 | 25002220 | 0.984 | 0.069 |
| CN_641 | 342424981 | 7046427 | 22312102 | 0.979 | 0.065 |
| CN_642 | 342380502 | 7830050 | 19818371 | 0.977 | 0.058 |
| CN_643 | 375665730 | 7148526 | 27796431 | 0.981 | 0.074 |
| CN_644 | 337969487 | 5138699 | 21480465 | 0.985 | 0.064 |
| CN_645 | 364105336 | 6096229 | 26589724 | 0.983 | 0.073 |
| CN_646 | 367149548 | 6617708 | 23473697 | 0.982 | 0.064 |
| CN_647 | 368142251 | 7835394 | 22756974 | 0.979 | 0.062 |
| CN_648 | 331444663 | 5231002 | 22035635 | 0.984 | 0.066 |
| CN_649 | 334618589 | 6253129 | 21500288 | 0.981 | 0.064 |
| CN_650 | 361113647 | 8019031 | 23364918 | 0.978 | 0.065 |

|        |           |         |          |       |       |
|--------|-----------|---------|----------|-------|-------|
| CN_651 | 356345077 | 6422088 | 22286927 | 0.982 | 0.063 |
| CN_652 | 350130663 | 6052902 | 22771316 | 0.983 | 0.065 |
| CN_653 | 366529871 | 7626481 | 25264833 | 0.979 | 0.069 |
| CN_654 | 361221707 | 5512130 | 23989126 | 0.985 | 0.066 |
| CN_655 | 366194043 | 5743418 | 23986197 | 0.984 | 0.066 |
| CN_656 | 373124338 | 5505501 | 26865415 | 0.985 | 0.072 |
| CN_657 | 299835000 | 3344564 | 23650781 | 0.989 | 0.079 |
| CN_658 | 351325364 | 2513050 | 43718312 | 0.993 | 0.124 |
| CN_659 | 298991831 | 2772481 | 24467612 | 0.991 | 0.082 |
| CN_660 | 301389552 | 3180085 | 24844677 | 0.989 | 0.082 |
| CN_661 | 304681550 | 3408819 | 27830003 | 0.989 | 0.091 |
| CN_662 | 300771599 | 3087036 | 23991263 | 0.990 | 0.080 |
| CN_663 | 311949130 | 3730691 | 29004078 | 0.988 | 0.093 |
| CN_664 | 308127236 | 4194677 | 25646062 | 0.986 | 0.083 |
| CN_665 | 306261578 | 3415605 | 25072662 | 0.989 | 0.082 |
| CN_666 | 401549133 | 3643255 | 36280444 | 0.991 | 0.090 |
| CN_667 | 312760549 | 3045961 | 27432765 | 0.990 | 0.088 |
| CN_668 | 312901410 | 3353807 | 28907594 | 0.989 | 0.092 |
| CN_669 | 302770476 | 3160814 | 24281011 | 0.990 | 0.080 |
| CN_670 | 388340966 | 3524927 | 38325244 | 0.991 | 0.099 |
| CN_671 | 344362334 | 3061577 | 34431696 | 0.991 | 0.100 |
| CN_672 | 397709847 | 4019205 | 36969000 | 0.990 | 0.093 |
| CN_673 | 394715719 | 4505144 | 36175290 | 0.989 | 0.092 |
| CN_674 | 353428466 | 3191526 | 31413545 | 0.991 | 0.089 |

|        |           |         |          |       |       |
|--------|-----------|---------|----------|-------|-------|
| CN_675 | 389594029 | 4981266 | 25611147 | 0.987 | 0.066 |
| CN_676 | 371984436 | 6790381 | 40727118 | 0.982 | 0.109 |
| CN_677 | 374723915 | 7321420 | 36981951 | 0.980 | 0.099 |
| CN_678 | 382103786 | 6351800 | 26583450 | 0.983 | 0.070 |
| CN_679 | 360056998 | 8683386 | 18778516 | 0.976 | 0.052 |
| CN_680 | 315144243 | 3603580 | 28268495 | 0.989 | 0.090 |
| CN_681 | 392540415 | 6846427 | 38038237 | 0.983 | 0.097 |
| CN_682 | 409764236 | 4037606 | 39232357 | 0.990 | 0.096 |
| CN_683 | 416170269 | 2947402 | 38999982 | 0.993 | 0.094 |
| CN_684 | 355864540 | 9543686 | 34687804 | 0.973 | 0.097 |
| CN_685 | 332624867 | 3785607 | 33219869 | 0.989 | 0.100 |
| CN_686 | 346645629 | 6859077 | 22429883 | 0.980 | 0.065 |
| CN_687 | 371777838 | 6238361 | 26284586 | 0.983 | 0.071 |
| CN_688 | 333521202 | 6039395 | 22015532 | 0.982 | 0.066 |
| CN_689 | 325521040 | 3495264 | 32821280 | 0.989 | 0.101 |
| CN_690 | 342271552 | 3910786 | 28808072 | 0.989 | 0.084 |
| CN_691 | 319337384 | 2901252 | 25555090 | 0.991 | 0.080 |
| CN_692 | 336521461 | 5689039 | 19465663 | 0.983 | 0.058 |
| CN_693 | 371601348 | 6789221 | 34765946 | 0.982 | 0.094 |
| CN_694 | 360392680 | 7367416 | 22145368 | 0.980 | 0.061 |
| CN_695 | 338194930 | 5652088 | 21614123 | 0.983 | 0.064 |
| CN_696 | 412067683 | 3725289 | 38323631 | 0.991 | 0.093 |
| CN_697 | 392173912 | 6647967 | 23304651 | 0.983 | 0.059 |
| CN_698 | 341378784 | 3186598 | 35159437 | 0.991 | 0.103 |

|        |           |         |          |       |       |
|--------|-----------|---------|----------|-------|-------|
| CN_699 | 385313558 | 7309859 | 39506192 | 0.981 | 0.103 |
| CN_700 | 354368480 | 4665164 | 20288886 | 0.987 | 0.057 |
| CN_701 | 343758430 | 7608923 | 19375267 | 0.978 | 0.056 |
| CN_702 | 371045702 | 7138321 | 28613034 | 0.981 | 0.077 |
| CN_703 | 385961784 | 6488635 | 42214936 | 0.983 | 0.109 |
| CN_704 | 300161210 | 3076877 | 25181607 | 0.990 | 0.084 |
| CN_705 | 358397296 | 5227142 | 21690543 | 0.985 | 0.061 |
| CN_706 | 359882723 | 3466524 | 30774281 | 0.990 | 0.086 |
| CN_707 | 377888955 | 7066046 | 23116476 | 0.981 | 0.061 |
| CN_708 | 324779405 | 4503662 | 17419275 | 0.986 | 0.054 |
| CN_709 | 394805009 | 8006635 | 45189254 | 0.980 | 0.114 |
| CN_710 | 325553150 | 3476633 | 26903421 | 0.989 | 0.083 |
| CN_711 | 393841858 | 5914111 | 32891264 | 0.985 | 0.084 |
| CN_712 | 361204089 | 5506737 | 23638645 | 0.985 | 0.065 |
| CN_713 | 351286971 | 6057535 | 19240391 | 0.983 | 0.055 |
| CN_714 | 367906269 | 7790675 | 38686550 | 0.979 | 0.105 |
| CN_715 | 374736917 | 5894289 | 43239196 | 0.984 | 0.115 |
| CN_716 | 335076894 | 6563142 | 30423082 | 0.980 | 0.091 |
| CN_717 | 300381579 | 3552210 | 23290287 | 0.988 | 0.078 |
| CN_718 | 358963528 | 6912771 | 34513477 | 0.981 | 0.096 |
| CN_719 | 360592096 | 6140877 | 21236353 | 0.983 | 0.059 |
| CN_720 | 373846420 | 6872533 | 43099989 | 0.982 | 0.115 |
| CN_721 | 454360085 | 9766381 | 37241753 | 0.979 | 0.082 |
| CN_722 | 351912903 | 5913919 | 23836397 | 0.983 | 0.068 |

|        |           |          |          |       |       |
|--------|-----------|----------|----------|-------|-------|
| CN_723 | 368087781 | 6682974  | 21979109 | 0.982 | 0.060 |
| CN_724 | 364590503 | 7110736  | 21705864 | 0.980 | 0.060 |
| CN_725 | 329432020 | 7057543  | 18758313 | 0.979 | 0.057 |
| CN_726 | 362995238 | 9121399  | 32285687 | 0.975 | 0.089 |
| CN_727 | 297454431 | 2968422  | 23629962 | 0.990 | 0.079 |
| CN_728 | 316406405 | 5084801  | 16816351 | 0.984 | 0.053 |
| CN_729 | 370866470 | 5578422  | 20737966 | 0.985 | 0.056 |
| CN_730 | 324705285 | 3520551  | 27259833 | 0.989 | 0.084 |
| CN_731 | 332143124 | 6306973  | 18360226 | 0.981 | 0.055 |
| CN_732 | 341589578 | 3821648  | 29159117 | 0.989 | 0.085 |
| CN_733 | 376313757 | 6686649  | 23130681 | 0.982 | 0.061 |
| CN_734 | 382652577 | 7049214  | 28532079 | 0.982 | 0.075 |
| CN_735 | 359822310 | 6462039  | 21132398 | 0.982 | 0.059 |
| CN_736 | 358230419 | 7264046  | 21270517 | 0.980 | 0.059 |
| CN_737 | 331381575 | 6583569  | 18095060 | 0.980 | 0.055 |
| CN_738 | 317661696 | 2892111  | 26919943 | 0.991 | 0.085 |
| CN_739 | 359970342 | 7768895  | 19951373 | 0.978 | 0.055 |
| CN_740 | 307897083 | 3546524  | 24953719 | 0.988 | 0.081 |
| CN_741 | 356312088 | 5349189  | 22316157 | 0.985 | 0.063 |
| CN_742 | 337977846 | 5549398  | 21338762 | 0.984 | 0.063 |
| CN_743 | 383103070 | 11133070 | 22673130 | 0.971 | 0.059 |
| CN_744 | 338892942 | 6578579  | 22769356 | 0.981 | 0.067 |
| CN_745 | 372993886 | 4307702  | 38816651 | 0.988 | 0.104 |
| CN_746 | 368660006 | 6006111  | 32626197 | 0.984 | 0.088 |

|        |           |          |          |       |       |
|--------|-----------|----------|----------|-------|-------|
| CN_747 | 350037066 | 8254171  | 21715913 | 0.976 | 0.062 |
| CN_748 | 404289458 | 4568881  | 38932153 | 0.989 | 0.096 |
| CN_749 | 308578069 | 3107848  | 24176052 | 0.990 | 0.078 |
| CN_750 | 299845744 | 3200067  | 25078258 | 0.989 | 0.084 |
| CN_751 | 365018308 | 4872832  | 23105150 | 0.987 | 0.063 |
| CN_752 | 301685381 | 2645190  | 24442840 | 0.991 | 0.081 |
| CN_753 | 351578626 | 6960283  | 18120569 | 0.980 | 0.052 |
| CN_754 | 380677815 | 2810191  | 36050524 | 0.993 | 0.095 |
| CN_755 | 355258309 | 6549935  | 20158136 | 0.982 | 0.057 |
| CN_756 | 392907423 | 3445073  | 37203182 | 0.991 | 0.095 |
| CN_757 | 363347780 | 8071125  | 36630897 | 0.978 | 0.101 |
| CN_758 | 327436290 | 6384953  | 17801376 | 0.981 | 0.054 |
| CN_759 | 337960986 | 7288022  | 31045179 | 0.978 | 0.092 |
| CN_760 | 394057895 | 8652870  | 34326340 | 0.978 | 0.087 |
| CN_761 | 335407146 | 6620700  | 18489068 | 0.980 | 0.055 |
| CN_762 | 361884353 | 6427453  | 20439025 | 0.982 | 0.056 |
| CN_763 | 352121353 | 10036195 | 33647680 | 0.971 | 0.096 |
| CN_764 | 359548532 | 6843588  | 35828582 | 0.981 | 0.100 |
| CN_765 | 377732377 | 7387061  | 36011740 | 0.980 | 0.095 |
| CN_766 | 397646358 | 6919621  | 41317244 | 0.983 | 0.104 |
| CN_767 | 378022588 | 6548652  | 36262075 | 0.983 | 0.096 |
| CN_768 | 387462975 | 7034551  | 25237799 | 0.982 | 0.065 |
| CN_769 | 340601372 | 5965491  | 18693289 | 0.982 | 0.055 |
| CN_770 | 363494369 | 5619202  | 23405542 | 0.985 | 0.064 |

|        |           |         |          |       |       |
|--------|-----------|---------|----------|-------|-------|
| CN_771 | 350743356 | 6002509 | 18937552 | 0.983 | 0.054 |
| CN_772 | 381328080 | 6027327 | 29684093 | 0.984 | 0.078 |
| CN_773 | 357779480 | 7890891 | 20427807 | 0.978 | 0.057 |
| CN_774 | 351919360 | 6279168 | 18684587 | 0.982 | 0.053 |
| CN_775 | 386949638 | 5106488 | 25875782 | 0.987 | 0.067 |
| CN_776 | 364754768 | 6212868 | 20054833 | 0.983 | 0.055 |
| CN_777 | 415706239 | 7537785 | 31683346 | 0.982 | 0.076 |
| CN_778 | 369853934 | 6876528 | 29056453 | 0.981 | 0.079 |
| CN_779 | 375718832 | 7947898 | 22958359 | 0.979 | 0.061 |
| CN_780 | 390179647 | 7330257 | 24713788 | 0.981 | 0.063 |
| CN_781 | 390482092 | 8114100 | 30000195 | 0.979 | 0.077 |
| CN_782 | 379711460 | 6971330 | 21729237 | 0.982 | 0.057 |
| CN_783 | 389240802 | 6967112 | 26017648 | 0.982 | 0.067 |
| CN_784 | 386097150 | 6622437 | 22775824 | 0.983 | 0.059 |
| CN_785 | 419874954 | 4943183 | 29637301 | 0.988 | 0.071 |
| CN_786 | 370332353 | 6465277 | 22379090 | 0.983 | 0.060 |
| CN_787 | 378252367 | 9346632 | 19813783 | 0.975 | 0.052 |
| CN_788 | 390510700 | 7498533 | 31157122 | 0.981 | 0.080 |
| CN_789 | 335876089 | 6658285 | 16913969 | 0.980 | 0.050 |
| CN_790 | 345139751 | 7018603 | 17668425 | 0.980 | 0.051 |
| CN_791 | 322986005 | 4755102 | 18224426 | 0.985 | 0.056 |
| CN_792 | 339823425 | 7430985 | 19050814 | 0.978 | 0.056 |
| CN_793 | 376147772 | 7178781 | 23870675 | 0.981 | 0.063 |
| CN_794 | 340819446 | 6423709 | 25825352 | 0.981 | 0.076 |

|        |           |         |          |       |       |
|--------|-----------|---------|----------|-------|-------|
| CN_795 | 345494526 | 2544908 | 35046749 | 0.993 | 0.101 |
| CN_796 | 359671122 | 6403682 | 18976502 | 0.982 | 0.053 |
| CN_797 | 328958740 | 5487281 | 18546846 | 0.983 | 0.056 |
| CN_798 | 390765262 | 5645652 | 29443535 | 0.986 | 0.075 |

---

AD, Alzheimer disease; CN, cognitively normal control
