# Supplementary material for: Whole-genome sequencing reveals novel ethnicity-specific rare variants associated with Alzheimer’s disease
Source: PubMed Central journal article supplement (PMC9135624; doi:10.1038/s41380-022-01483-0), 2022-03-10
Supplement: 41380_2022_1483_MOESM5_ESM.pdf [file 41380_2022_1483_MOESM5_ESM.pdf]

**Table S2. A total of 300 candidate genes showing an association with AD at  $P_{BH} < 0.01$** 

| gene symbol        | gene ID | SetSize | $P$      | $P_{BH}$ | $P_{bon}$    |
|--------------------|---------|---------|----------|----------|--------------|
| <b><i>MLKL</i></b> | 197259  | 6       | 2.09E-06 | 0.010    | <b>0.010</b> |
| <i>DNAH8</i>       | 1769    | 13      | 1.87E-05 | 0.030    | 0.092        |
| <i>TTN</i>         | 7273    | 88      | 2.38E-05 | 0.030    | 0.117        |
| <i>TRPM1</i>       | 4308    | 6       | 2.75E-05 | 0.030    | 0.135        |
| <i>SH3RF2</i>      | 153769  | 8       | 3.10E-05 | 0.030    | 0.152        |
| <i>OSBPL5</i>      | 114879  | 2       | 4.71E-05 | 0.039    | 0.232        |
| <i>LRBA</i>        | 987     | 8       | 6.22E-05 | 0.039    | 0.306        |
| <i>GLCCI1</i>      | 113263  | 2       | 6.71E-05 | 0.039    | 0.330        |
| <i>FAM13A</i>      | 10144   | 3       | 7.23E-05 | 0.039    | 0.355        |
| <i>RASGRF2</i>     | 5924    | 3       | 0.0001   | 0.049    | 0.494        |
| <i>PDS5B</i>       | 23047   | 2       | 0.0001   | 0.060    | 0.666        |
| <i>ZYG11A</i>      | 440590  | 4       | 0.0001   | 0.060    | 0.737        |
| <i>PRSS57</i>      | 400668  | 3       | 0.0002   | 0.060    | 0.799        |
| <i>SBF2</i>        | 81846   | 4       | 0.0002   | 0.060    | 0.841        |
| <i>PPFIA4</i>      | 8497    | 5       | 0.0002   | 0.060    | 0.972        |
| <i>SAMD9L</i>      | 219285  | 5       | 0.0002   | 0.060    | 0.972        |
| <i>FARP1</i>       | 10160   | 4       | 0.0002   | 0.060    | 1            |
| <i>SHE</i>         | 126669  | 2       | 0.0002   | 0.060    | 1            |
| <i>ARAP3</i>       | 64411   | 3       | 0.0002   | 0.060    | 1            |
| <i>PLEKHG3</i>     | 26030   | 4       | 0.0002   | 0.060    | 1            |
| <i>DNAH11</i>      | 8701    | 26      | 0.0003   | 0.060    | 1            |
| <i>OR51G1</i>      | 79324   | 6       | 0.0003   | 0.060    | 1            |

|                 |        |    |        |       |   |
|-----------------|--------|----|--------|-------|---|
| <i>PCNT</i>     | 5116   | 14 | 0.0003 | 0.060 | 1 |
| <i>PLEC</i>     | 5339   | 27 | 0.0003 | 0.060 | 1 |
| <i>C1orf167</i> | 284498 | 8  | 0.0003 | 0.061 | 1 |
| <i>LGR5</i>     | 8549   | 5  | 0.0003 | 0.061 | 1 |
| <i>GNPTAB</i>   | 79158  | 6  | 0.0004 | 0.061 | 1 |
| <i>NEDD4</i>    | 4734   | 6  | 0.0004 | 0.061 | 1 |
| <i>RHBDF2</i>   | 79651  | 4  | 0.0004 | 0.061 | 1 |
| <i>CRB1</i>     | 23418  | 2  | 0.0004 | 0.061 | 1 |
| <i>NCOR2</i>    | 9612   | 9  | 0.0004 | 0.061 | 1 |
| <i>DENND3</i>   | 22898  | 4  | 0.0004 | 0.061 | 1 |
| <i>H6PD</i>     | 9563   | 9  | 0.0004 | 0.061 | 1 |
| <i>MORC2</i>    | 22880  | 2  | 0.0004 | 0.061 | 1 |
| <i>PGC</i>      | 5225   | 3  | 0.0005 | 0.065 | 1 |
| <i>BTA1F1</i>   | 9044   | 4  | 0.0005 | 0.069 | 1 |
| <i>ZNF883</i>   | 169834 | 4  | 0.0005 | 0.069 | 1 |
| <i>TLR1</i>     | 7096   | 5  | 0.0005 | 0.069 | 1 |
| <i>GLIS2</i>    | 84662  | 2  | 0.0006 | 0.071 | 1 |
| <i>PCDHA12</i>  | 56137  | 3  | 0.0006 | 0.079 | 1 |
| <i>CEP70</i>    | 80321  | 2  | 0.0007 | 0.080 | 1 |
| <i>PF4</i>      | 5196   | 2  | 0.0007 | 0.082 | 1 |
| <i>ANKLE1</i>   | 126549 | 2  | 0.0007 | 0.083 | 1 |
| <i>SLC37A1</i>  | 54020  | 3  | 0.0008 | 0.083 | 1 |
| <i>PPM1E</i>    | 22843  | 3  | 0.0008 | 0.083 | 1 |
| <i>EXO1</i>     | 9156   | 2  | 0.0008 | 0.083 | 1 |

|                |        |    |        |       |   |
|----------------|--------|----|--------|-------|---|
| <i>ESR2</i>    | 2100   | 3  | 0.0009 | 0.083 | 1 |
| <i>ZNF221</i>  | 7638   | 2  | 0.0009 | 0.083 | 1 |
| <i>TAS2R40</i> | 259286 | 4  | 0.0009 | 0.083 | 1 |
| <i>TDRD12</i>  | 91646  | 6  | 0.0009 | 0.083 | 1 |
| <i>PIK3C2G</i> | 5288   | 5  | 0.0009 | 0.083 | 1 |
| <i>ZNF613</i>  | 79898  | 3  | 0.0009 | 0.083 | 1 |
| <i>OR4X2</i>   | 119764 | 2  | 0.0009 | 0.084 | 1 |
| <i>PTPRU</i>   | 10076  | 5  | 0.0010 | 0.084 | 1 |
| <i>DYSF</i>    | 8291   | 9  | 0.0010 | 0.084 | 1 |
| <i>ZNF714</i>  | 148206 | 4  | 0.0010 | 0.084 | 1 |
| <i>SPATA21</i> | 374955 | 4  | 0.0010 | 0.084 | 1 |
| <i>RNF213</i>  | 57674  | 10 | 0.0010 | 0.084 | 1 |
| <i>EYA1</i>    | 2138   | 5  | 0.0011 | 0.086 | 1 |
| <i>CORIN</i>   | 10699  | 5  | 0.0011 | 0.086 | 1 |
| <i>ABCA13</i>  | 154664 | 12 | 0.0011 | 0.086 | 1 |
| <i>PTPRN</i>   | 5798   | 3  | 0.0011 | 0.088 | 1 |
| <i>DMD</i>     | 1756   | 13 | 0.0012 | 0.088 | 1 |
| <i>KRT9</i>    | 3857   | 2  | 0.0012 | 0.088 | 1 |
| <i>DST</i>     | 667    | 12 | 0.0012 | 0.088 | 1 |
| <i>PDIA5</i>   | 10954  | 3  | 0.0013 | 0.099 | 1 |
| <i>LMTK2</i>   | 22853  | 4  | 0.0014 | 0.099 | 1 |
| <i>PAPPA</i>   | 5069   | 8  | 0.0014 | 0.102 | 1 |
| <i>CHST3</i>   | 9469   | 2  | 0.0015 | 0.108 | 1 |
| <i>TBCCD1</i>  | 55171  | 2  | 0.0016 | 0.112 | 1 |

|                 |        |    |        |       |   |
|-----------------|--------|----|--------|-------|---|
| <i>MYH11</i>    | 4629   | 4  | 0.0016 | 0.112 | 1 |
| <i>ZNF479</i>   | 90827  | 3  | 0.0017 | 0.112 | 1 |
| <i>KCNE1</i>    | 3753   | 2  | 0.0017 | 0.112 | 1 |
| <i>NVL</i>      | 4931   | 4  | 0.0017 | 0.112 | 1 |
| <i>RIMS2</i>    | 9699   | 4  | 0.0017 | 0.114 | 1 |
| <i>CR2</i>      | 1380   | 3  | 0.0018 | 0.115 | 1 |
| <i>GREB1</i>    | 9687   | 7  | 0.0019 | 0.115 | 1 |
| <i>ADAMTSL1</i> | 92949  | 13 | 0.0019 | 0.115 | 1 |
| <i>OAS2</i>     | 4939   | 3  | 0.0019 | 0.115 | 1 |
| <i>DYNC1H1</i>  | 1778   | 4  | 0.0019 | 0.115 | 1 |
| <i>RNF222</i>   | 643904 | 2  | 0.0020 | 0.115 | 1 |
| <i>LY9</i>      | 4063   | 4  | 0.0020 | 0.115 | 1 |
| <i>PCLO</i>     | 27445  | 7  | 0.0020 | 0.115 | 1 |
| <i>ALDH16A1</i> | 126133 | 2  | 0.0020 | 0.115 | 1 |
| <i>AFP</i>      | 174    | 3  | 0.0020 | 0.115 | 1 |
| <i>AKNA</i>     | 80709  | 4  | 0.0020 | 0.115 | 1 |
| <i>TRIM59</i>   | 286827 | 2  | 0.0020 | 0.115 | 1 |
| <i>CRTAC1</i>   | 55118  | 5  | 0.0021 | 0.117 | 1 |
| <i>ZNF862</i>   | 643641 | 4  | 0.0021 | 0.118 | 1 |
| <i>PDCD11</i>   | 22984  | 8  | 0.0022 | 0.118 | 1 |
| <i>PLA2G4D</i>  | 283748 | 6  | 0.0023 | 0.123 | 1 |
| <i>PLA2G4C</i>  | 8605   | 3  | 0.0024 | 0.127 | 1 |
| <i>IGSF8</i>    | 93185  | 5  | 0.0024 | 0.127 | 1 |
| <i>NCKIPSD</i>  | 51517  | 2  | 0.0024 | 0.127 | 1 |

|                 |        |    |        |       |   |
|-----------------|--------|----|--------|-------|---|
| <i>MYOM3</i>    | 127294 | 7  | 0.0026 | 0.133 | 1 |
| <i>FGFBP3</i>   | 143282 | 3  | 0.0026 | 0.133 | 1 |
| <i>FAM126A</i>  | 84668  | 6  | 0.0027 | 0.134 | 1 |
| <i>MVP</i>      | 9961   | 4  | 0.0027 | 0.134 | 1 |
| <i>RASAL2</i>   | 9462   | 5  | 0.0027 | 0.134 | 1 |
| <i>FNDC1</i>    | 84624  | 6  | 0.0028 | 0.134 | 1 |
| <i>OR2T7</i>    | 81458  | 2  | 0.0028 | 0.134 | 1 |
| <i>ENGASE</i>   | 64772  | 4  | 0.0028 | 0.134 | 1 |
| <i>SIGIRR</i>   | 59307  | 2  | 0.0029 | 0.134 | 1 |
| <i>RYR2</i>     | 6262   | 5  | 0.0030 | 0.134 | 1 |
| <i>ARHGEF18</i> | 23370  | 7  | 0.0030 | 0.134 | 1 |
| <i>MAP1S</i>    | 55201  | 6  | 0.0030 | 0.134 | 1 |
| <i>USP26</i>    | 83844  | 2  | 0.0031 | 0.134 | 1 |
| <i>OLFML2A</i>  | 169611 | 4  | 0.0031 | 0.134 | 1 |
| <i>WNK2</i>     | 65268  | 11 | 0.0031 | 0.134 | 1 |
| <i>PNKD</i>     | 25953  | 3  | 0.0032 | 0.134 | 1 |
| <i>SCNN1B</i>   | 6338   | 2  | 0.0032 | 0.134 | 1 |
| <i>CCDC168</i>  | 643677 | 18 | 0.0032 | 0.134 | 1 |
| <i>GMCL1</i>    | 64395  | 2  | 0.0032 | 0.134 | 1 |
| <i>TNC</i>      | 3371   | 9  | 0.0033 | 0.134 | 1 |
| <i>CYP4F3</i>   | 4051   | 4  | 0.0033 | 0.134 | 1 |
| <i>IPPK</i>     | 64768  | 3  | 0.0033 | 0.134 | 1 |
| <i>PRUNE2</i>   | 158471 | 8  | 0.0033 | 0.134 | 1 |
| <i>NCAPG2</i>   | 54892  | 2  | 0.0033 | 0.134 | 1 |

|                 |        |    |        |       |   |
|-----------------|--------|----|--------|-------|---|
| <i>HIST1H1C</i> | 3006   | 3  | 0.0034 | 0.134 | 1 |
| <i>DNAH9</i>    | 1770   | 14 | 0.0034 | 0.134 | 1 |
| <i>ADAM28</i>   | 10863  | 4  | 0.0035 | 0.134 | 1 |
| <i>ABCA7</i>    | 10347  | 11 | 0.0035 | 0.134 | 1 |
| <i>MED1</i>     | 5469   | 2  | 0.0035 | 0.134 | 1 |
| <i>CCDC57</i>   | 284001 | 5  | 0.0035 | 0.134 | 1 |
| <i>APC</i>      | 324    | 8  | 0.0035 | 0.134 | 1 |
| <i>JSRP1</i>    | 126306 | 2  | 0.0036 | 0.134 | 1 |
| <i>ACTR8</i>    | 93973  | 2  | 0.0036 | 0.134 | 1 |
| <i>SLC22A7</i>  | 10864  | 2  | 0.0036 | 0.134 | 1 |
| <i>PKP3</i>     | 11187  | 3  | 0.0036 | 0.134 | 1 |
| <i>FAM13B</i>   | 51306  | 2  | 0.0036 | 0.134 | 1 |
| <i>NMUR1</i>    | 10316  | 6  | 0.0036 | 0.134 | 1 |
| <i>GANAB</i>    | 23193  | 5  | 0.0036 | 0.134 | 1 |
| <i>TSGA10</i>   | 80705  | 2  | 0.0036 | 0.134 | 1 |
| <i>MADCAM1</i>  | 8174   | 3  | 0.0037 | 0.134 | 1 |
| <i>PDCL2</i>    | 132954 | 2  | 0.0037 | 0.134 | 1 |
| <i>BCAM</i>     | 4059   | 3  | 0.0038 | 0.134 | 1 |
| <i>HSPG2</i>    | 3339   | 14 | 0.0038 | 0.134 | 1 |
| <i>PLXND1</i>   | 23129  | 5  | 0.0038 | 0.134 | 1 |
| <i>CSPG4</i>    | 1464   | 8  | 0.0039 | 0.134 | 1 |
| <i>NOX5</i>     | 79400  | 5  | 0.0039 | 0.134 | 1 |
| <i>PDE4DIP</i>  | 9659   | 10 | 0.0039 | 0.134 | 1 |
| <i>SPTBN2</i>   | 6712   | 7  | 0.0039 | 0.134 | 1 |

|                  |           |   |        |       |   |
|------------------|-----------|---|--------|-------|---|
| <i>NAALAD2</i>   | 10003     | 2 | 0.0040 | 0.134 | 1 |
| <i>KCNH3</i>     | 23416     | 3 | 0.0040 | 0.134 | 1 |
| <i>ZNF230</i>    | 7773      | 2 | 0.0040 | 0.134 | 1 |
| <i>AMPD1</i>     | 270       | 5 | 0.0041 | 0.134 | 1 |
| <i>ZDBF2</i>     | 57683     | 5 | 0.0041 | 0.134 | 1 |
| <i>ARHGAP40</i>  | 343578    | 4 | 0.0041 | 0.134 | 1 |
| <i>KIAA1324L</i> | 222223    | 2 | 0.0041 | 0.134 | 1 |
| <i>DPY19L4</i>   | 286148    | 4 | 0.0041 | 0.134 | 1 |
| <i>NCR3</i>      | 259197    | 3 | 0.0042 | 0.134 | 1 |
| <i>GPR132</i>    | 29933     | 2 | 0.0042 | 0.134 | 1 |
| <i>KIAA1614</i>  | 57710     | 4 | 0.0042 | 0.134 | 1 |
| <i>PIEZO2</i>    | 63895     | 5 | 0.0042 | 0.135 | 1 |
| <i>ANGPTL7</i>   | 10218     | 4 | 0.0042 | 0.135 | 1 |
| <i>PLOD2</i>     | 5352      | 3 | 0.0043 | 0.135 | 1 |
| <i>SLFN12L</i>   | 100506736 | 2 | 0.0043 | 0.135 | 1 |
| <i>ELMO3</i>     | 79767     | 5 | 0.0044 | 0.136 | 1 |
| <i>ITGB4</i>     | 3691      | 4 | 0.0044 | 0.136 | 1 |
| <i>STAG3</i>     | 10734     | 2 | 0.0044 | 0.136 | 1 |
| <i>LRRC37B</i>   | 114659    | 3 | 0.0045 | 0.136 | 1 |
| <i>MYH7</i>      | 4625      | 3 | 0.0045 | 0.136 | 1 |
| <i>NCAN</i>      | 1463      | 5 | 0.0046 | 0.136 | 1 |
| <i>PGAP1</i>     | 80055     | 3 | 0.0046 | 0.136 | 1 |
| <i>TNN</i>       | 63923     | 5 | 0.0046 | 0.136 | 1 |
| <i>PLBD2</i>     | 196463    | 2 | 0.0047 | 0.136 | 1 |

|                  |           |        |        |       |   |
|------------------|-----------|--------|--------|-------|---|
| <i>TTC34</i>     | 100287898 | 4      | 0.0047 | 0.136 | 1 |
| <i>CROCC</i>     | 9696      | 13     | 0.0047 | 0.136 | 1 |
| <i>SLIT1</i>     | 6585      | 5      | 0.0048 | 0.136 | 1 |
| <i>COL22A1</i>   | 169044    | 8      | 0.0048 | 0.136 | 1 |
| <i>ZNF544</i>    | 27300     | 3      | 0.0049 | 0.136 | 1 |
| <i>FAM186A</i>   | 121006    | 3      | 0.0049 | 0.136 | 1 |
| <i>COL27A1</i>   | 85301     | 6      | 0.0049 | 0.136 | 1 |
| <i>TRIM50</i>    | 135892    | 2      | 0.0049 | 0.136 | 1 |
| <i>TG</i>        | 7038      | 10     | 0.0049 | 0.136 | 1 |
| <i>WDR72</i>     | 256764    | 3      | 0.0049 | 0.136 | 1 |
| <i>UHRF1BP1L</i> | 23074     | 3      | 0.0049 | 0.136 | 1 |
| <i>MKRN2</i>     | 23609     | 2      | 0.0049 | 0.136 | 1 |
| <i>VEGFB</i>     | 7423      | 3      | 0.0050 | 0.137 | 1 |
| <i>AKAP12</i>    | 9590      | 7      | 0.0050 | 0.137 | 1 |
| <i>SIM1</i>      | 6492      | 2      | 0.0050 | 0.137 | 1 |
| <i>EHD4</i>      | 30844     | 5      | 0.0051 | 0.137 | 1 |
| <i>SLC7A8</i>    | 23428     | 3      | 0.0052 | 0.139 | 1 |
| <i>GTF2A1L</i>   | 11036     | 2      | 0.0052 | 0.139 | 1 |
| <i>TARBP1</i>    | 6894      | 9      | 0.0053 | 0.139 | 1 |
| <i>FSIP2</i>     | 401024    | 19     | 0.0053 | 0.139 | 1 |
| <i>ISX</i>       | 91464     | 2      | 0.0053 | 0.139 | 1 |
| <i>LYST</i>      | 1130      | 5      | 0.0053 | 0.139 | 1 |
| <i>PPP1R3F</i>   | 89801     | 2+D200 | 0.0054 | 0.139 | 1 |
| <i>DGKH</i>      | 160851    | 5      | 0.0055 | 0.141 | 1 |



|                 |        |    |        |       |   |
|-----------------|--------|----|--------|-------|---|
| <i>SFXN2</i>    | 118980 | 3  | 0.0055 | 0.142 | 1 |
| <i>MYO7B</i>    | 4648   | 7  | 0.0056 | 0.144 | 1 |
| <i>ARHGEF4</i>  | 50649  | 8  | 0.0057 | 0.144 | 1 |
| <i>MUC5B</i>    | 727897 | 21 | 0.0057 | 0.144 | 1 |
| <i>CLMN</i>     | 79789  | 3  | 0.0058 | 0.144 | 1 |
| <i>ARMC7</i>    | 79637  | 3  | 0.0058 | 0.144 | 1 |
| <i>IQCE</i>     | 23288  | 5  | 0.0058 | 0.144 | 1 |
| <i>SLC12A3</i>  | 6559   | 2  | 0.0058 | 0.144 | 1 |
| <i>HLA-A</i>    | 3105   | 6  | 0.0059 | 0.145 | 1 |
| <i>ABI3BP</i>   | 25890  | 7  | 0.0060 | 0.146 | 1 |
| <i>DNAH1</i>    | 25981  | 15 | 0.0060 | 0.146 | 1 |
| <i>AP4B1</i>    | 10717  | 4  | 0.0060 | 0.146 | 1 |
| <i>ZDHHC5</i>   | 25921  | 3  | 0.0061 | 0.147 | 1 |
| <i>GLRX2</i>    | 51022  | 3  | 0.0061 | 0.147 | 1 |
| <i>RPS6KB2</i>  | 6199   | 4  | 0.0061 | 0.147 | 1 |
| <i>SERPINB7</i> | 8710   | 3  | 0.0062 | 0.147 | 1 |
| <i>AGR3</i>     | 155465 | 4  | 0.0062 | 0.147 | 1 |
| <i>SZT2</i>     | 23334  | 4  | 0.0065 | 0.152 | 1 |
| <i>EFCAB5</i>   | 374786 | 6  | 0.0065 | 0.152 | 1 |
| <i>NBEAL2</i>   | 23218  | 7  | 0.0066 | 0.153 | 1 |
| <i>STARD13</i>  | 90627  | 2  | 0.0066 | 0.153 | 1 |
| <i>RBP3</i>     | 5949   | 6  | 0.0067 | 0.156 | 1 |
| <i>SEZ6</i>     | 124925 | 3  | 0.0068 | 0.156 | 1 |
| <i>CNTRL</i>    | 11064  | 6  | 0.0068 | 0.157 | 1 |

|                 |        |    |        |       |   |
|-----------------|--------|----|--------|-------|---|
| <i>CELSR1</i>   | 9620   | 9  | 0.0069 | 0.158 | 1 |
| <i>PTPN3</i>    | 5774   | 2  | 0.0069 | 0.158 | 1 |
| <i>LAMA5</i>    | 3911   | 12 | 0.0070 | 0.159 | 1 |
| <i>COL6A5</i>   | 256076 | 6  | 0.0071 | 0.159 | 1 |
| <i>MLLT10</i>   | 8028   | 3  | 0.0073 | 0.159 | 1 |
| <i>FLG</i>      | 2312   | 30 | 0.0073 | 0.159 | 1 |
| <i>SVEP1</i>    | 79987  | 7  | 0.0073 | 0.159 | 1 |
| <i>ENDOV</i>    | 284131 | 2  | 0.0074 | 0.159 | 1 |
| <i>ZNF16</i>    | 7564   | 2  | 0.0074 | 0.159 | 1 |
| <i>ZC3H12A</i>  | 80149  | 3  | 0.0075 | 0.159 | 1 |
| <i>RAD52</i>    | 5893   | 3  | 0.0075 | 0.159 | 1 |
| <i>MGA</i>      | 23269  | 9  | 0.0075 | 0.159 | 1 |
| <i>TLX1</i>     | 3195   | 3  | 0.0075 | 0.159 | 1 |
| <i>BMS1</i>     | 9790   | 4  | 0.0075 | 0.159 | 1 |
| <i>ZNF747</i>   | 65988  | 3  | 0.0075 | 0.159 | 1 |
| <i>STXBP2</i>   | 6813   | 2  | 0.0076 | 0.159 | 1 |
| <i>XPC</i>      | 7508   | 4  | 0.0076 | 0.159 | 1 |
| <i>CNTROB</i>   | 116840 | 4  | 0.0076 | 0.159 | 1 |
| <i>ARMC3</i>    | 219681 | 4  | 0.0077 | 0.159 | 1 |
| <i>QSER1</i>    | 79832  | 3  | 0.0078 | 0.159 | 1 |
| <i>MMP15</i>    | 4324   | 4  | 0.0078 | 0.159 | 1 |
| <i>TSEN54</i>   | 283989 | 3  | 0.0078 | 0.159 | 1 |
| <i>PRDM4</i>    | 11108  | 4  | 0.0079 | 0.159 | 1 |
| <i>CATSPER1</i> | 117144 | 7  | 0.0079 | 0.159 | 1 |

|                 |        |    |        |       |   |
|-----------------|--------|----|--------|-------|---|
| <i>AK7</i>      | 122481 | 5  | 0.0081 | 0.159 | 1 |
| <i>TRDN</i>     | 10345  | 2  | 0.0082 | 0.159 | 1 |
| <i>DHRS1</i>    | 115817 | 3  | 0.0082 | 0.159 | 1 |
| <i>AGBL4</i>    | 84871  | 2  | 0.0083 | 0.159 | 1 |
| <i>KLC3</i>     | 147700 | 5  | 0.0083 | 0.159 | 1 |
| <i>ADH4</i>     | 127    | 4  | 0.0084 | 0.159 | 1 |
| <i>RNF212</i>   | 285498 | 5  | 0.0085 | 0.159 | 1 |
| <i>OAS3</i>     | 4940   | 5  | 0.0085 | 0.159 | 1 |
| <i>THEMIS</i>   | 387357 | 2  | 0.0086 | 0.159 | 1 |
| <i>AKNAD1</i>   | 254268 | 5  | 0.0087 | 0.159 | 1 |
| <i>CC2D2B</i>   | 387707 | 9  | 0.0087 | 0.159 | 1 |
| <i>SYNE2</i>    | 23224  | 17 | 0.0087 | 0.159 | 1 |
| <i>SUMF2</i>    | 25870  | 2  | 0.0087 | 0.159 | 1 |
| <i>ARHGEF35</i> | 445328 | 2  | 0.0087 | 0.159 | 1 |
| <i>DDX4</i>     | 54514  | 3  | 0.0088 | 0.159 | 1 |
| <i>STK36</i>    | 27148  | 5  | 0.0088 | 0.159 | 1 |
| <i>DAPK2</i>    | 23604  | 4  | 0.0089 | 0.159 | 1 |
| <i>FAT3</i>     | 120114 | 10 | 0.0089 | 0.159 | 1 |
| <i>BNC2</i>     | 54796  | 4  | 0.0089 | 0.159 | 1 |
| <i>ANKRD35</i>  | 148741 | 3  | 0.0090 | 0.159 | 1 |
| <i>NOTCH4</i>   | 4855   | 4  | 0.0090 | 0.159 | 1 |
| <i>PRDM2</i>    | 7799   | 6  | 0.0091 | 0.159 | 1 |
| <i>ARHGAP23</i> | 57636  | 5  | 0.0091 | 0.159 | 1 |
| <i>PUS7L</i>    | 83448  | 3  | 0.0091 | 0.159 | 1 |

|                  |        |   |        |       |   |
|------------------|--------|---|--------|-------|---|
| <i>LLGL1</i>     | 3996   | 3 | 0.0092 | 0.159 | 1 |
| <i>MYEOV</i>     | 26579  | 3 | 0.0092 | 0.159 | 1 |
| <i>CHD6</i>      | 84181  | 5 | 0.0092 | 0.159 | 1 |
| <i>NPBWR2</i>    | 2832   | 2 | 0.0092 | 0.159 | 1 |
| <i>IARS2</i>     | 55699  | 3 | 0.0093 | 0.159 | 1 |
| <i>KRTAP10-1</i> | 386677 | 3 | 0.0093 | 0.159 | 1 |
| <i>SNX29</i>     | 92017  | 2 | 0.0093 | 0.159 | 1 |
| <i>SRPK1</i>     | 6732   | 2 | 0.0093 | 0.159 | 1 |
| <i>OR51E1</i>    | 143503 | 3 | 0.0094 | 0.159 | 1 |
| <i>IQSEC1</i>    | 9922   | 2 | 0.0094 | 0.159 | 1 |
| <i>ATG4C</i>     | 84938  | 2 | 0.0094 | 0.159 | 1 |
| <i>SGSM3</i>     | 27352  | 2 | 0.0094 | 0.159 | 1 |
| <i>ZNF594</i>    | 84622  | 6 | 0.0095 | 0.159 | 1 |
| <i>DHDH</i>      | 27294  | 2 | 0.0095 | 0.159 | 1 |
| <i>CIAPIN1</i>   | 57019  | 2 | 0.0095 | 0.159 | 1 |
| <i>COMMD1</i>    | 150684 | 2 | 0.0096 | 0.159 | 1 |
| <i>SLC22A6</i>   | 9356   | 2 | 0.0096 | 0.159 | 1 |
| <i>PAQR6</i>     | 79957  | 2 | 0.0096 | 0.159 | 1 |
| <i>BACH1</i>     | 571    | 2 | 0.0096 | 0.159 | 1 |
| <i>OR10Z1</i>    | 128368 | 2 | 0.0096 | 0.159 | 1 |
| <i>KIFC3</i>     | 3801   | 2 | 0.0096 | 0.159 | 1 |
| <i>PLIN4</i>     | 729359 | 7 | 0.0096 | 0.159 | 1 |
| <i>CITED2</i>    | 10370  | 2 | 0.0096 | 0.159 | 1 |
| <i>TRAFD1</i>    | 10906  | 2 | 0.0096 | 0.159 | 1 |

|                   |        |    |        |       |   |
|-------------------|--------|----|--------|-------|---|
| <i>CNGA4</i>      | 1262   | 2  | 0.0096 | 0.159 | 1 |
| <i>DNAJC5G</i>    | 285126 | 3  | 0.0097 | 0.159 | 1 |
| <i>HMCN1</i>      | 83872  | 13 | 0.0097 | 0.159 | 1 |
| <i>THEG</i>       | 51298  | 2  | 0.0097 | 0.159 | 1 |
| <i>UMOD</i>       | 7369   | 2  | 0.0097 | 0.159 | 1 |
| <i>LANCL1</i>     | 10314  | 2  | 0.0097 | 0.159 | 1 |
| <i>EGFLAM</i>     | 133584 | 2  | 0.0097 | 0.159 | 1 |
| <i>ADAMTS4</i>    | 9507   | 4  | 0.0098 | 0.159 | 1 |
| <i>KRTAP10-11</i> | 386678 | 2  | 0.0099 | 0.159 | 1 |
| <i>ZNF721</i>     | 170960 | 3  | 0.0099 | 0.159 | 1 |
| <i>CLIC6</i>      | 54102  | 2  | 0.0099 | 0.159 | 1 |
| <i>ASPG</i>       | 374569 | 2  | 0.0099 | 0.159 | 1 |
| <i>CSRNP1</i>     | 64651  | 2  | 0.0100 | 0.159 | 1 |
| <i>CPNE7</i>      | 27132  | 2  | 0.0100 | 0.159 | 1 |

*P*: genome-wide gene-based burden testing on coding rare variants.

*P<sub>BH</sub>*: Benjamini-Hochberg (BH) corrected *P*.

*P<sub>bon</sub>*: Bonferroni-corrected *P*.
